# Supplementary material for: Re-utilization of drinking water treatment residuals (DWTR): a review focused on the adsorption of inorganic and organic contaminants in wastewater and soil
Source: Royal Society of Chemistry journal article supplement (doi:10.1039/d3ew00927k), 2024-01-01
Supplement: d3ew00927k1.pdf [file d3ew00927k1.pdf]

**Reutilizations of drinking water treatment residuals (DWTR):  
A review focused on the adsorption of contaminants in wastewater and soil**

Nelson Belzile\*, Yu-Wei Chen  
School of Natural Sciences  
Laurentian University  
Sudbury, Ontario, P3E 2C6 Canada

\*Corresponding author

Email address: [nbelzile@laurentian.ca](mailto:nbelzile@laurentian.ca)

Table S1. Chemical composition of Drinking Water Treatment Residues (DWTR) expressed in (%) as oxides and used analytical techniques.

| Source                                               | SiO <sub>2</sub>      | Al <sub>2</sub> O <sub>3</sub>   | Fe <sub>2</sub> O <sub>3</sub>    | CaO                               | MgO                          | K <sub>2</sub> O             | Na <sub>2</sub> O            | TiO <sub>2</sub> | Analytical technique | pH                            | Comments                                                          | Reference                                         |
|------------------------------------------------------|-----------------------|----------------------------------|-----------------------------------|-----------------------------------|------------------------------|------------------------------|------------------------------|------------------|----------------------|-------------------------------|-------------------------------------------------------------------|---------------------------------------------------|
| El-Fustat, Egypt                                     | 36.51                 | 22.21                            | 5.65                              | 2.66                              | 1.34                         | 0.49                         | 1.35                         | -                | XRF                  | -                             | Albite appears at 500°C                                           | Abo-El-Enein et al., 2017                         |
| Ghasiabad, India                                     | 52.78                 | 14.38                            | 5.20                              | 4.39                              | 3.08                         | 3.62                         | 0.97                         | 0.61             | ED-XRF               | 6.82                          | Most particles > 0.1 mm                                           | Ahmad et al., 2016a,b                             |
| Taq, Iraq                                            | 36.29                 | 27.92                            | 5.33                              | 3.77                              | 1.12                         | 1.81                         | 1.31                         | -                | Not given            | -                             | For cement slabs                                                  | Ahmed et al., 2022                                |
| 17 plants, UK (Al, Fe)                               | -                     | 0.93-28.69                       | 0.11-42.62                        | 0.09-3.48                         | 0.03-1.53                    | -                            | -                            | -                | ICP-AES              | 4.1-7.1                       | Estimated from elemental values                                   | Al-Tahmazi and Babatunde, 2016                    |
| Various locations<br>1. Alum<br>2. Ferric<br>3. Lime | 33.4±26.2<br>nd<br>nd | 56.1±25.1<br>18.9±9.1<br>0.9±1.5 | 14.6±17.2<br>37.2±22.2<br>4.7±8.3 | 4.1±2.4<br>11.6±13.3<br>46.3±29.5 | 1.5±1.3<br>2.6<br>3.7±1.7    | -                            | -                            | -                | Various techniques   | 7.0±1.4<br>8.0±1.6<br>8.9±1.8 | Compiled from several studies and estimated from elemental values | Babatunde and Zhao, 2007                          |
| Kildare, Ireland                                     | -                     | 8.06                             | 0.48                              | 0.11                              | 0.04                         | -                            | -                            | -                | ICP-MS               | 5.9                           | For P removal in wetlands                                         | Babatunde et al., 2009                            |
| Turkey                                               | 16.02                 | 2.62                             | 48.23                             | 8.10                              | 1.15                         | 0.31                         | 0.30                         | 0.53             | XRF                  | 7.92                          | For soil improvement                                              | Bağrıaçık and Güner, 2020                         |
| Beijing, China                                       | -                     | 18.52                            | 19.06                             | 3.01                              | 0.31                         | -                            | -                            | -                | ICP-AES              | 6.84                          | Estimated from elemental values                                   | Bai et al., 2014a                                 |
| Istanbul, Turkey                                     | 9.41                  | 51.01                            | 0.70                              | 1.31                              | 0.22                         | 0.20                         | 0.07                         | 0.05             | XRF                  | 7.0                           | Geotechnical study                                                | Balkaya, 2015                                     |
| Perth, Australia<br>A<br>B<br>C<br>D                 | -                     | 0.05<br>27.22<br>21.17<br>19.85  | 45.76<br>0.37<br>1.29<br>0.99     | 1.27<br>0.45<br>0.50<br>0.48      | 0.12<br>0.06<br>0.38<br>0.04 | 0.01<br>0.01<br>0.01<br>0.01 | 0.04<br>0.22<br>0.10<br>0.07 | -                | ICP-OES              | 7.3<br>6.9<br>6.8<br>7.4      | Estimated from elemental values                                   | Bal Krishna et al., 2016                          |
| El-Jidida, Morocco                                   | 29.6                  | 19.7                             | 9.6                               | 6.3                               | 1.7                          | 3.6                          | -                            | 1.2              | ICP-OES              | -                             | Tested to recover Al                                              | Ballou et al., 2022                               |
| Fort Collins, USA<br>1991<br>2002                    | -                     | 11.91<br>11.15                   | 2.79<br>0.02                      | 0.48<br>1.75                      | -                            | 0.50<br>0.21                 | -                            | -                | ICP-AES              | 6.8<br>7.1                    | Estimated from elemental values                                   | Bayley et al., 2008                               |
| Rabat, Morocco                                       | 27.12                 | 62.66                            | 1.16                              | 1.25                              | 0.37                         | 0.83                         | 0.24                         | 0.16             | XRF                  | -                             | In ceramic bricks                                                 | Benlalla et al., 2015                             |
| Columbia                                             | 60.91                 | 19.72                            | 11.59                             | 1.48                              | 1.47                         | 2.42                         | -                            | 0.96             | XRF                  | -                             | In mortars                                                        | Bohórquez González et al., 2020                   |
| 1. Arcadia (Al)<br>2. Tampa (Fe)<br>USA              | -                     | 26.46<br>0.47                    | 0.64<br>21.45                     | 0.53<br>3.64                      | 0.16<br>0.14                 | 0.09<br>0.03                 | -                            | -                | ICP-AES              | 6.2<br>6.9                    | For P removal in surface water. Estimated from elemental values.  | Boyer et al., 2011                                |
| Malaysia                                             | 43.29                 | 32.19                            | 5.52                              | 0.17                              | 0.33                         | 2.08                         | 0.13                         | -                | XRF                  | 6.6                           | For cement incorporation                                          | Breesem et al., 2016                              |
| 1. Abbanoa (Al)<br>2. Sassari (Fe),<br>Italy         | -                     | 24.93<br>3.65                    | 2.48<br>35.10                     | 1.54<br>0.01                      | 0.34<br>0.01                 | 0.46<br>0.01                 | 0.02<br>-                    | -                | EDS                  | 6.45<br>7.88                  | Estimated from elemental values.                                  | Castaldi et al., 2014; 2015; Silveti et al., 2015 |
| Marrakech, Morocco                                   | 45.05                 | 25.93                            | 7.84                              | 3.79                              | 3.80                         | 3.81                         | 1.73                         | 0.86             | XRF                  | -                             | For olive oil mill wastewater                                     | Chahid et al., 2015                               |

|                          |       |       |       |       |      |      |      |      |                    |      |                                                   |                                                 |
|--------------------------|-------|-------|-------|-------|------|------|------|------|--------------------|------|---------------------------------------------------|-------------------------------------------------|
| China                    | 52.18 | 19.90 | 6.29  | 1.68  | 1.38 | 2.90 | 0.97 | -    | ICP-OES            | -    | For cement production                             | Chen et al., 2010                               |
| Sudbury, Canada          | 3.97  | 37.79 | 0.54  | 0.42  | 0.04 | -    | 0.01 | -    | ICP-OES            | 5.1  | For anionic metals and metalloids                 | Chen et al., 2018                               |
| Fong Yuan, Taiwan, China | 53.36 | 15.28 | 21.01 | 1.20  | -    | 5.41 | -    | 1.38 | XRF                | 6.76 | In lightweight bricks                             | Chiang et al., 2009                             |
| Flanders, Belgium        | 10.7  | 1.9   | 87.2  | 9.5   | 0.4  | 0.4  | -    | 0.1  | XRF                | 8.1  | Estimated from elemental values                   | Chiang et al., 2012                             |
| Rock Hall, USA           | -     | 11.72 | 29.17 | 0.13  | 0.01 | 0.01 | 1.63 | -    | AAS                | 8.0  | Estimated from elemental values                   | Codling et al., 2000; Codling and Isensee, 2005 |
| Barcelona, Spain         | 53.7  | 15.8  | 5.0   | 14.4  | 3.6  | 3.2  | 0.4  | 0.7  | XRF                | -    | For ceramic tiles production                      | Cremades et al., 2018                           |
| Wadi, India              | 42.31 | 21.21 | 21.65 | 7.44  | 2.06 | -    | 0.19 | -    | XRF                | 7.74 | To recover Al                                     | Dahasahastra et al., 2022                       |
| Bouregreg, Morocco       | 33.08 | 48.94 | 4.46  | 4.67  | 0.7  | 2.53 | 0.0  | 0.36 | WD-XRF             | -    | For cement production                             | Dahhou et al., 2018                             |
| Oklahoma, USA 21 samples | -     | 18.20 | 3.53  | 3.47  | -    | 0.56 | -    | -    | ICP                | 7.24 | Estimated from average values                     | Dayton et al., 2003                             |
| Southern region, Brazil  | 52.2  | 26.7  | 12.4  | 0.5   | 1.5  | 4.2  | -    | -    | SEM-EDS XRF        | -    | As a supplement for cement                        | de Godoy et al, 2019; 2020                      |
| Southern region, Brazil  | 40.5  | 28.5  | 9.5   | 0.3   | 0.4  | 0.4  | 0.1  | 1.0  | XRF                | 5.13 | Source of fine mortar aggregates                  | de Oliveira-Andrade et al., 2018                |
| Sharkia, Egypt           | 54.1  | 28.84 | 9.92  | 3.1   | 0.64 | 0.75 | 0.30 | 1.28 | Not given          | -    | For composite cement                              | El-Didamony et al., 2014                        |
| El-bohera, Egypt         | 22.38 | 11.79 | 2.41  | 1.43  | 1.51 | 0.47 | 0.69 | 0.65 | SEM-EDS            | 6.5  | As nanoparticles. Estimated from elemental values | El-Kammah et al, 2022a; b; c                    |
| El-bohera, Egypt         | 46.6  | 11.9  | 71.0  | 9.7   | -    | -    | -    | -    | SEM-EDS            | 6.7  | Estimated from elemental values                   | Elkhatib et al., 2015;                          |
| Various locations        | 20.0  | 21.2  | 3.2   | 2.7   | 0.5  | 1.7  | -    | -    | Various techniques | 7.0  | For land application                              | Elliott and Dempsey, 1991                       |
| Alum                     | nd    | 1.6   | 10.9  | 15.0  | 1.6  | 0.3  | -    | -    |                    | 7.3  |                                                   |                                                 |
| Ferric Lime              | 0.8   | 0.5   | 0.3   | 45.1  | 2.1  | 0.0  | -    | -    |                    | 10.2 |                                                   |                                                 |
| Bradenton, USA           | -     | 16.84 | 0.52  | 2.13  | 0.02 | -    | -    | -    | ICP-AES            | 5.25 | To test P leaching from treated soils             | Elliott et al., 2002                            |
| Al                       | -     | 1.60  | 46.90 | 2.30  | 0.12 | -    | -    | -    |                    | 6.25 |                                                   |                                                 |
| Fe                       | -     | 0.11  | 0.06  | 49.32 | 1.55 | -    | -    | -    |                    | 8.93 |                                                   |                                                 |
| Ca                       | -     | -     | -     | -     | -    | -    | -    | -    | -                  | -    | -                                                 | -                                               |
| Mexico City, Mexico      | 33.2  | 31.98 | 4.94  | 0.64  | 0.63 | 0.43 | 0.41 | -    | XRF                | 5.94 | To produce zeolites                               | Espejel-Ayala et al., 2013                      |
| Kluizen, Belgium         | 11.10 | 73.90 | -     | 1.90  | -    | -    | -    | -    | XRF                | -    | For granulation at high temperature               | Everaert et al., 2013                           |
| Caracas, Venezuela       | 36.24 | 29.46 | 10.05 | 0.98  | 1.23 | 3.31 | 0.83 | 1.23 | XRF                | -    | As a composite for cement                         | Frías et al., 2014                              |
| Activated 600°C          | 41.54 | 33.60 | 11.09 | 0.42  | 1.51 | 3.67 | 0.98 | 1.36 |                    |      |                                                   |                                                 |
| Mumbai, India            | -     | 12.21 | 13.30 | 3.82  | 2.89 | 2.41 | -    | -    | ICP                | 6.4  | Modeling dye                                      | Gadekar and                                     |

|                                                                        |                                                          |                                        |                                        |                                       |                                      |                              |               |      |                |                   |                                                          |                                |
|------------------------------------------------------------------------|----------------------------------------------------------|----------------------------------------|----------------------------------------|---------------------------------------|--------------------------------------|------------------------------|---------------|------|----------------|-------------------|----------------------------------------------------------|--------------------------------|
|                                                                        |                                                          |                                        |                                        |                                       |                                      |                              |               |      | SEM-EDS        |                   | removal                                                  | Ahammed, 2019                  |
| Beijing, China                                                         | -                                                        | 7.58                                   | 12.74                                  | 0.99                                  | 1.06                                 | -                            | -             | -    | ICP-AES        | -                 | Estimated from elemental values                          | Gao et al., 2013               |
| Sao Paulo, Brazil                                                      | 34.92                                                    | 34.11                                  | 7.19                                   | -                                     | 0.61                                 | 1.76                         | -             | 0.79 | XRF            | -                 | For geopolymer application                               | Geraldo et al., 2017           |
| Mumbai, India                                                          | 26.46                                                    | 25.60                                  | 12.84                                  | 2.71                                  | 2.04                                 | 0.60                         | 0.17          | -    | ICP-AES        | 7.29              | Estimated from elemental values                          | Ghorpade and Ahammed, 2018     |
| Dartmouth<br>Waterloo<br>Brandon,<br>Canada<br>Tampa Bay, USA          | -                                                        | 27.93<br>35.34<br>1.65<br>1.27         | 1.65<br>1.38<br>0.14<br>31.27          | 0.36<br>3.68<br>45.82<br>6.66         | 0.06<br>0.61<br>6.94<br>0.39         | -                            | -             | -    | FAAS           |                   | For P adsorption. Estimated from elemental values        | Gibbons et al., 2009           |
| Dartmouth<br>Waterloo<br>Brandon, Canada<br>New York<br>Tampa Bay, USA | -                                                        | 23.85<br>18.33<br>1.81<br>6.27<br>1.27 | 1.19<br>0.99<br>0.16<br>38.30<br>39.65 | 0.18<br>1.48<br>39.48<br>4.51<br>5.98 | 0.02<br>0.37<br>6.76<br>1.86<br>0.37 | -                            | -             | -    | ICP-AES        | -                 | For P and As adsorption. Estimated from elemental values | Gibbons and Gagnon, 2010; 2011 |
| SãoPaulo, Brazil                                                       | 44.80                                                    | 30.23                                  | 12.17                                  | 0.37                                  | 0.83                                 | 2.01                         | 0.19          | 1.30 | XRF            | -                 | For mortars repair                                       | Hemkemeier et al., 2023        |
| Yu Qing<br>Que He<br>Xue Shan<br>Sun He, China                         | -                                                        | 21.22<br>12.13<br>12.68<br>17.26       | 4.45<br>2.53<br>2.50<br>6.05           | 7.15<br>13.71<br>14.62<br>1.90        | 2.26<br>1.96<br>1.31<br>1.98         | 1.42<br>1.13<br>1.10<br>1.55 | -             | -    | SEM-EDS        | -                 | For P adsorption. Estimated from elemental values        | Hou et al., 2018               |
| Brisbane,<br>Australia                                                 | 5.33                                                     | 21.00                                  | 2.63                                   | 0.01                                  | 0.02                                 | 0.05                         | 0.06          | -    | ICP-AES        | 6.4               | Estimated from elemental values                          | Hua et al., 2015               |
| Taipei, Taiwan,<br>China                                               | 43.42                                                    | 10.48                                  | 5.51                                   | 0.06                                  | -                                    | 0.92                         | 0.52          | -    | ICP-AES        | 6.59              | For brick making                                         | Huang et al., 2001             |
| Taiwan, China                                                          | 52.75                                                    | 20.15                                  | 6.75                                   | 0.3                                   | -                                    | 3.69                         | 0.87          | -    | ICP-AES<br>EDS | 6.59              | In bricks and artificial aggregate                       | Huang et al., 2005             |
| Various plants,<br>Taiwan, China                                       | 54.8-65.6                                                | 19.6-23.0                              | 4.91-11.30                             | 0.72-4.26                             | 1.06-4.15                            | 0.79-<br>2.08                | 0.08-<br>1.99 | -    | ED-XRF         | -                 | For lightweight aggregate                                | Huang and Wang, 2013           |
| Englewood, USA<br>(Al)                                                 | -                                                        | 12.11                                  | 2.51                                   | 5.87                                  | 0.64                                 | 0.37                         | 0.06          | -    | ICP-AES        | 7.6               | Estimated from elemental values                          | Ippolito and Barbarick, 2006   |
| Fort Collins, USA                                                      | 42.16                                                    | 14.12                                  | 2.54                                   | 2.20                                  | 0.75                                 | -                            | -             | -    | ICP-AES        | 6.9               | Estimated from elemental values                          | Ippolito et al., 2009          |
| 3 locations,<br>Taiwan, China                                          | 37.62<br>32.19<br>52.79                                  | 40.79<br>22.67<br>14.99                | 19.50<br>19.36<br>19.67                | -                                     | -                                    | -                            | -             | -    | ICP-AES        | 6.1<br>6.8<br>6.5 | Washed to remove impurities                              | Irawan et al., 2011            |
| Go-san, South<br>Korea                                                 | 16.41<br>(105°C)<br>21.43<br>(300°C)<br>21.47<br>(500°C) | 42.48<br>60.07<br>47.12                | 0.77<br>1.29<br>1.14                   | -                                     | 0.37<br>0.50<br>0.65                 | -                            | -             | -    | SEM-EDS        | -                 | Estimated from elemental values                          | Jeon et al., 2018              |
| Beijing, China                                                         | 21.25                                                    | 23.10                                  | 42.00                                  | 9.36                                  | 0.58                                 | 0.38                         | 0.28          | 0.23 | ICP-AES        | -                 | Added to blast furnace slag to form geopolymer           | Ji and Pei, 2020               |

|                                                |                                  |                                  |                              |                              |                              |                              |                              |      |                |                |                                      |                             |
|------------------------------------------------|----------------------------------|----------------------------------|------------------------------|------------------------------|------------------------------|------------------------------|------------------------------|------|----------------|----------------|--------------------------------------|-----------------------------|
| Australia (1)<br>Xi'an China (2)<br>(3)<br>(4) | 26.59<br>28.16<br>28.83<br>26.94 | 29.35<br>27.76<br>28.60<br>29.54 | 4.93<br>6.98<br>5.79<br>4.31 | 1.73<br>4.01<br>1.39<br>3.98 | 0.64<br>1.02<br>0.99<br>0.98 | 1.08<br>1.44<br>1.62<br>0.87 | 0.44<br>0.37<br>0.58<br>0.17 | -    | XRF            | -              | For cement-based materials           | Jia et al., 2021            |
| Seoul, South Korea                             | 29.3                             | 30.7                             | 4.8                          | 1.0                          | -                            | 1.2                          | -                            | -    | XRF            | -              | Calcined at high temperature         | Jung et al., 2016a          |
| Seoul, South Korea                             | 42.0                             | 39.3                             | 8.3                          | 1.4                          | -                            | 1.9                          | -                            | -    | XRF            | -              | Al recovery and reuse                | Jung et al., 2016b; c       |
| Go-san, South Korea                            | 16.4                             | 38.5                             | 2.9                          | -                            | 0.37                         | -                            | -                            | -    | XRF<br>SEM-EDS | -              | Pelletization with bentonite         | Jo et al., 2021a            |
| Putrajaya, Malaysia                            | 48.82                            | 40.42                            | 5.30                         | 0.22                         | 0.44                         | 2.08                         | 0.08                         | -    | XRF            | 7.70           | In self-compacting concrete          | Kaish et al., 2018          |
| Putrajaya, Malaysia                            | 41.98                            | 33.09                            | 5.05                         | 0.43                         | 0.31                         | 1.83                         | 0.06                         | 0.58 | XRF            | -              | As a replacement for fine aggregate  | Kaish et al., 2021          |
| Go-san, South Korea                            | 35.6                             | 51.1                             | 4.02                         | 0.96                         | 0.52                         | 1.22                         | 0.24                         | 0.32 | XRF            | -              | Binder and gelling solution          | Kang et al., 2019a          |
| Lithuania                                      | 10.90                            | 1.34                             | 68.65                        | 8.23                         | 0.61                         | -                            | -                            | -    | EDS            | 7.81           | For ceramic products                 | Kizinievič et al., 2013     |
| Beijing, China                                 | 19.89                            | 35.24                            | 34.88                        | 4.95                         | 0.28                         | 0.29                         | -                            | 0.22 | XRF            | -              | Use for granulated materials         | Li et al., 2020             |
| Australia                                      | 17.1                             | 30.1                             | 3.1                          | 4.1                          | 0.6                          | 0.5                          | 0.2                          | -    | XRF            | -              | In mortar                            | Li et al., 2021             |
| Waanshan, China                                | 57.64                            | 20.41                            | 9.21                         | 3.24                         | 2.63                         | 3.76                         | -                            | -    | EDS            | -              | Estimated from elemental values      | Lian et al., 2020           |
| Taipei, Taiwan, China                          | 53.6                             | 20.9                             | 6.6                          | 0.3                          | 1.9                          | -                            | -                            | -    | Not given      | 6.7            | For pavement materials               | Lin et al., 2006            |
| Sungai Dua Penang, Malaysia                    | 40.33                            | 31.84                            | 6.43                         | 0.09                         | 0.48                         | 1.32                         | 0.04                         | 0.46 | XRF            | -              | Substitute of green clay in ceramics | Ling et al., 2017           |
| Happy Valley, Australia                        | 26.43                            | 28.27                            | 6.66                         | 5.36                         | 1.11                         | 1.23                         | -                            | -    | XRF            | -              | For concrete paving blocks           | Liu et al., 2020a; b        |
| Adelaide, Australia                            | 31.11                            | 47.68                            | 4.94                         | 4.32                         | 0.96                         | 0.97                         | 0.19                         | -    | XRF            | -              | In cement blocks                     | Liu et al., 2021a; b; 2022a |
| Bradenton, USA (Al)<br>(Fe)                    | -                                | 17.46<br>1.85                    | 35.89<br>1.85                | -                            | -                            | -                            | -                            | -    | ICP-AES        | 5.4<br>6.3     |                                      | Makris et al., 2004         |
| Bradenton, USA (Al)<br>(Fe)                    | -                                | 16-5-20.8<br>0.25                | 0.66- 1.74<br>24.31          | -                            | -                            | -                            | -                            | -    | ICP-AES        | 5.6-6.1<br>6.0 | Estimated from elemental values      | Makris et al., 2006a; b     |
| Rio de Janeiro, Brazil                         | 24.68                            | 30.39                            | 11.59                        | 0.16                         | 0.17                         | 0.35                         | -                            | 0.90 | XRF            | -              | In red ceramic                       | Monteiro et al., 2008       |
| Surat, India                                   | 0.82                             | 21.26                            | 6.91                         | 2.87                         | 1.81                         | -                            | -                            | -    | ICP-AES        | 6.4            | Estimated from elemental values      | Nair and Ahammed, 2015      |
| Meet Khames, Egypt                             | -                                | 41.2                             | 1.1                          | 1.2                          | 0.73                         | -                            | -                            | -    | ICP            | -              | For P removal                        | Nawar et al., 2015          |
| Bangkok, Thailand                              | 58.99                            | 24.64                            | 6.63                         | 0.69                         | 1.14                         | 1.54                         | 4.08                         | 0.88 | XRF            | -              | In geopolymers                       | Nimwinya et al., 2016       |

|                                                                            |                                                    |                                                  |                                                   |                                               |                                              |                                              |                                           |                                              |           |                                              |                                     |                                                               |
|----------------------------------------------------------------------------|----------------------------------------------------|--------------------------------------------------|---------------------------------------------------|-----------------------------------------------|----------------------------------------------|----------------------------------------------|-------------------------------------------|----------------------------------------------|-----------|----------------------------------------------|-------------------------------------|---------------------------------------------------------------|
| Araki Meotoisi Tataru, Japan                                               | 40.0<br>59.8<br>54.2                               | 49.9<br>29.7<br>31.2                             | 5.6<br>6.0<br>7.4                                 | 1.4<br>1.1<br>1.6                             | -                                            | -                                            | -                                         | -                                            | XRF       | 6.2<br>6.3<br>6.4                            | A possible use for defluoridation   | Oh and Chikushi, 2010                                         |
| Morgan, Australia                                                          | -                                                  | 13.66                                            | 11.76                                             | 2.38                                          | -                                            | -                                            | 0.10                                      | -                                            | Not given | 7.3                                          | Estimated from elemental values     | Oliver et al., 2011                                           |
| Selangor, Malaysia                                                         | 42.38                                              | 35.03                                            | 4.94                                              | 0.13                                          | 0.29                                         | 1.87                                         | 0.10                                      | -                                            | XRF       | 7.2                                          | In concrete                         | Owaid et al., 2014;<br>Ching et al., 2021;<br>Ng et al., 2022 |
| South Australia                                                            | 26.43                                              | 28.27                                            | 7.66                                              | 5.36                                          | 1.11                                         | 1.23                                         | -                                         | -                                            | Not given | -                                            | In mortar                           | Pham et al., 2021                                             |
| Malaysia                                                                   | 43.5                                               | 28.6                                             | 7.8                                               |                                               |                                              | 2.1                                          |                                           |                                              | XRF       | 6.03                                         | In bricks                           | Rahman et al., 2019                                           |
| Cairo, Egypt                                                               | 43.12                                              | 15.97                                            | 5.26                                              | 5.56                                          | 0.85                                         | 0.26                                         | 0.52                                      | -                                            | Not given | -                                            | For brick manufacturing             | Ramadan et al., 2008                                          |
| Aswan, Egypt (2 sources)                                                   | 54.72<br>55.92                                     | 12.1<br>11.1                                     | 10.32<br>13.43                                    | -                                             | -                                            | -                                            | -                                         | -                                            | SEM-EDS   | -                                            | For methylene blue adsorption       | Rashed et al., 2016                                           |
| Barcelona, Spain                                                           | 29.63                                              | 17.57                                            | 5.18                                              | 11.85                                         | 2.15                                         | 2.85                                         | 6.09                                      | 0.56                                         | XRF       | -                                            | Cement industry                     | Rodriguez et al., 2010;<br>2011                               |
| Rio Grande do Sul, Brazil                                                  | 66.93                                              | 17.86                                            | 11.01                                             | 0.74                                          | -                                            | 1.35                                         |                                           | 1.10                                         | SEM-EDS   | -                                            | Cement industry                     | Ruviaro et al., 2021                                          |
| Bangkok, Thailand                                                          | 48.0                                               | 25.0                                             | 7.0                                               | 1.2                                           | 0.9                                          | 1.8                                          | -                                         | -                                            | XRF       | -                                            | For As adsorption and stabilization | Sarntanayoot et al., 2019                                     |
| York, United Kingdom                                                       | 10.28                                              | 44.24                                            | 2.51                                              | 2.50                                          | 0.34                                         | 0.43                                         | 0.15                                      | 0.16                                         | XRF       | -                                            | For cement-based materials          | Shamaki et al., 2021                                          |
| Yogyakarta, Indonesia                                                      | 0.02                                               | 13.23                                            | 4.29                                              | 0.70                                          | 0.33                                         | -                                            | -                                         | -                                            | ICP-AES   | -                                            | Estimated from elemental values     | Siswoyo et al., 2019                                          |
| Visakhapatnam, India                                                       | 1.6                                                | 47.2                                             | 7.18                                              | -                                             | -                                            | -                                            | -                                         | 20.65                                        | Not given | -                                            | For fluoride removal                | Sujana et al., 1998                                           |
| Minia, Egypt                                                               | 44.21                                              | 16.47                                            | 4.12                                              | 4.62                                          | 0.74                                         | 0.31                                         | 0.61                                      | -                                            | XRF       | -                                            | Calcined at 900°C                   | Tantawy, 2015                                                 |
| Minia, Egypt                                                               | 59.70                                              | 10.52                                            | 4.38                                              | 6.01                                          | 2.20                                         | 1.16                                         | 1.53                                      | -                                            | XRF       | -                                            | For brick manufacturing             | Tantawy and Mohamed, 2017                                     |
| Brisbane, Australia                                                        | 3.56                                               | 25.77                                            | 1.10                                              | 0.41                                          | 0.21                                         | 0.04                                         | -                                         | 0.27                                         | XRF       | 7.2                                          | Added to soils                      | Tay et al., 2017                                              |
| Pulau Indah, Malaysia                                                      | 36.38                                              | 19.74                                            | 2.34                                              | 2.83                                          | 0.24                                         | 0.43                                         | 0.14                                      | 0.18                                         | XRF       | -                                            | For roofing tiles                   | Teoh et al., 2022                                             |
| Midmar<br>Midvaal<br>Amatola<br>Rand<br>Faure 1<br>Faure 2<br>South Africa | 54.57<br>53.07<br>52.59<br>24.36<br>29.93<br>37.96 | 22.60<br>22.36<br>29.06<br>9.89<br>8.70<br>17.78 | 11.95<br>14.24<br>10.31<br>4.85<br>53.80<br>32.13 | 4.20<br>4.45<br>1.55<br>53.19<br>3.15<br>3.35 | 1.92<br>1.83<br>1.82<br>5.25<br>0.72<br>1.54 | 1.47<br>1.89<br>2.98<br>0.82<br>0.93<br>1.86 | 0.15<br>0.33<br>0.43<br>0.61<br>-<br>0.49 | 0.86<br>0.74<br>0.86<br>0.31<br>0.78<br>0.62 | XRF       | 7.78<br>7.66<br>6.94<br>8.66<br>6.19<br>7.23 | For land application                | Titshall and Hughes, 2005                                     |
| Chuncheon, South Korea                                                     | 19.10                                              | 47.20                                            | 2.10                                              | 0.42                                          | 0.18                                         | 0.46                                         | 0.14                                      | -                                            | XRF       | 6.69                                         | Tested as such and calcined         | Van Truong and Kim, 2021                                      |
| Bradenton, USA (Al)                                                        | -                                                  | 21.94                                            | 0.61                                              | 0.78                                          | 1.03                                         | -                                            | -                                         | -                                            | ICP-AES   | 6.62                                         | Estimated from elemental values     | Wagner et al., 2008                                           |
| Bangkaen, Thailand                                                         | 54.00                                              | 29.30                                            | 9.84                                              | 1.01                                          | 0.92                                         | 2.58                                         | -                                         | -                                            | XRF       | -                                            | In geopolymers                      | Waijarean et al., 2014                                        |

|                       |       |       |       |      |      |      |      |      |           |      |                                                 |                           |
|-----------------------|-------|-------|-------|------|------|------|------|------|-----------|------|-------------------------------------------------|---------------------------|
| Beijing, China        | -     | 16.14 | 16.59 | 2.84 | 0.25 | -    | -    | -    | ICP-AES   | 6.96 | Estimated from elemental values                 | Wang et al., 2014         |
| Hong Kong, China      | 40.60 | 41.31 | 8.56  | 1.55 | 0.86 | 2.15 | 0.18 | -    | XRF       | -    | For controlled low-strength materials           | Wang et al., 2018d        |
| Belo Oriente, Brazil  | 37.5  | 30.1  | 12.3  | 0.2  | 0.4  | 0.9  | 0.2  | 1.0  | XRF       | -    | Structural ceramics                             | Wolff et al., 2015        |
| Beijing, China        | 6.09  | 3.22  | 5.74  | 6.09 | 0.98 | 0.60 | 0.39 | -    | ICP-AES   | 7.16 | For cement                                      | Xu et al., 2014           |
| Dublin, Ireland       | -     | 46.05 | 1.21  | 1.16 | 0.75 | -    | -    | -    | ICP-AES   | -    | P removal from wastewater                       | Yang et al., 2006a        |
| Suzhou, China         | 54.80 | 14.86 | 3.46  | -    | -    | -    | 2.18 | -    | XRF       | 6.1  | For ammonium removal                            | Yang et al., 2015         |
| Xi'an, China          | 35.58 | 32.26 | 6.25  | 1.59 | 1.36 | 1.59 | 1.00 | 0.42 | XRF       | -    | For cement                                      | Yang et al., 2023         |
| Taipei, Taiwan, China | 49.2  | 26.3  | 6.6   | 0.8  | 1.0  | 3.2  | 0.6  | -    | ICP-AES   | -    | For cement raw materials                        | Yen et al., 2011          |
| Putrajaya, Malaysia   | 60.28 | 52.20 | 13.56 | -    | -    | 7.18 | -    | -    | EDS       | -    | Estimated from elemental values                 | Yusuff et al., 2017; 2018 |
| Mexico                | 33.23 | 31.98 | 4.94  | 0.64 | 0.63 | 0.43 | 0.41 | 0.48 | XRF       | -    | For ceramic production                          | Zamora et al., 2008       |
| Beijing, China        | -     | 18.52 | 19.02 | 2.94 | 0.30 | -    | -    | -    | ICP-AES   | 6.80 | Pesticide removal                               | Zhao et al., 2013; 2015   |
| Ballymore, Ireland    | 33.4  | 29.3  | 10.5  | 2.7  | 0.89 | -    | -    | -    | Not given | 6.9  | For clay brick. Estimated from elemental values | Zhao et al., 2016         |
| Brisbane, Australia   | 5.33  | 20.98 | 2.63  | 0.02 | 0.02 | 0.06 | 0.06 | -    | ICP-AES   | 6.8  | Estimated from elemental values                 | Zhou and Haynes, 2011a    |
| Beijing, China        | 16.5  | 16.6  | 50.9  | 7.06 | 0.83 | 0.25 | 0.28 | -    | XRF       | -    | NOM removal                                     | Zhou et al., 2018         |
| Harbin, China         | 40.61 | 27.36 | 6.99  | 2.62 | 1.89 | 1.28 | 1.05 | -    | XRF       | -    | For ceramicsite                                 | Zou et al., 2009          |

Abbreviation: AAS: Atomic Absorption Spectrometry; ED-XRF: Energy Dispersive X-Ray Fluorescence; FAAS: Flame Atomic Absorption Spectrometry; ICP-AES: Inductively Coupled Plasma – Atomic Emission Spectroscopy; ICP-OES: Inductively Coupled Plasma – Optical Emission Spectroscopy; NOM: Natural Organic Matter; SEM-EDS: Scanning Electron Microscopy – Energy Dispersive Spectroscopy; WD-XRF: Wavelength Dispersive XRF

Table S2. Conditions of adsorption of trace metals, metalloids, and some anions by DWTR and main observations.

| Origin/<br>(Based<br>Al, Fe, or Ca)            | Treatment/<br>Modification                      | Metals<br>Metalloids<br>Anions                    | Medium<br>tested                                               | Tested<br>contact<br>time                       | Tested<br>pH      | Main observations and comments                                                                                                                                                                                                                                                                                                                                                                                                                         | Reference                    |
|------------------------------------------------|-------------------------------------------------|---------------------------------------------------|----------------------------------------------------------------|-------------------------------------------------|-------------------|--------------------------------------------------------------------------------------------------------------------------------------------------------------------------------------------------------------------------------------------------------------------------------------------------------------------------------------------------------------------------------------------------------------------------------------------------------|------------------------------|
| El-Fustat, Egypt<br>(Al)                       | Dried, crushed<br>and fired at 100 to<br>700 °C | Cd(II)<br>Ni(II)<br>Pb(II)                        | Synthetic<br>solutions                                         | 0 - 25 h                                        | 3.0 - 8.0         | Batch experiments showing better removal at higher pH and lower doses of metals. Best removal after 25 h with DWTR fired at 500°C. General removal in the order Pb(II) > Cd(II) > Ni(II).                                                                                                                                                                                                                                                              | Abo-El-Enein et al., 2017    |
| Johore, Malaysia<br>(Al)                       | Oven-dried,<br>ground, and sieved<br>>2 mm      | Cu(II)                                            | Synthetic<br>solutions                                         | 0 - 720 min                                     | Not<br>controlled | Batch studies showing DWTR tested with other sorbents such as mussel shells and bentonite. More effective removal by mixtures with mussel shells with an adsorption capacity of 9.0-11.8 mg/g. Described by Langmuir isotherm.                                                                                                                                                                                                                         | Awab and Paramalinggam, 2011 |
| 1. Bradenton (Al)<br>2. Hillsboro (Fe),<br>USA | Dried, milled &<br>sorted in size<br>fractions  | As(III)<br>As(V)                                  | Synthetic<br>solutions                                         | 24 - 168 h<br>with or, w/o<br>competing<br>ions | 3.0 - 9.0         | Batch studies showing better removal of both species by Al-DWTR due to larger specific surface area, better by smaller particles of both DWTR and, better in the absence of competing ions. Maximum adsorption at pH 7 up to 40.3 and 50.0 mg/g for As(III) and As(V), respectively.                                                                                                                                                                   | Caporale et al., 2013        |
| 1. Abbanoa (Al)<br>2. Sassari (Fe),<br>Italy   | Dried, ground, and<br>sieved to <0.02 mm        | As(V)                                             | Synthetic<br>solutions                                         | 0 - 1500 min                                    | 4.0, 7.0,<br>9.0  | Batch studies showing better removal by Fe-DWTR than with Al-DWTR. Maximum adsorption at pH 4 and decreasing toward pH 9. Capacity estimated to 120 and 68 mg/g for As(III) and As(V), respectively. FTIR spectra proposing the formation of inner-sphere complexes. Also testing for P adsorption as reported in Table S3.                                                                                                                            | Castaldi et al., 2014        |
| 1. Abbanoa (Al)<br>2. Sassari (Fe),<br>Italy   | Dried, ground and<br>sieved to <0.02 mm         | Cu(II)<br>Pb(II)                                  | Synthetic<br>solutions                                         | 0 - 1500 min                                    | 4.5               | Batch studies showing better removal of both metals by Fe-DWTR at pH 4.5 and being slightly higher for Pb(II). Estimated adsorption capacity of 21.8 and 5.7 mg/g for Pb(II) and Cu(II), respectively. Influence of organic matter in the formation of inner-sphere complexes as revealed by FTIR spectroscopy.                                                                                                                                        | Castaldi et al., 2015        |
| Sudbury, Canada<br>(Al)                        | Dried and<br>homogenized                        | As(V)<br>Cr(VI)<br>Mo(VI)<br>Se(IV)               | Synthetic<br>solutions<br>and mine<br>tailing waters           | 0 - 450 min                                     | 3.0 - 8.0         | Batch studies showing complete As(V) removal at any pH and much faster in real mine waters. Better Se(VI) removal at pH < 5. Moderate removal of Cr(VI) and Mo(VI) in synthetic solutions but significantly faster in real mine waters. Estimated adsorption capacity going from 26 to 52 mg/g for As(V) in synthetic solutions to real mine waters, respectively with similar results for Se(VI). Adsorption of As on DWTR shown by XPS spectroscopy. | Chen et al., 2018            |
| Flanders, Belgium<br>(Fe)                      | Dried                                           | As(V), Cd(II)<br>Co(II), Ni(II)<br>Pb(II), Zn(II) | Synthetic<br>solutions,<br>surface<br>waters, and<br>sediments | 0 - 48 h                                        | 5.5               | Batch studies showing much better adsorption of metals in synthetic solutions in comparison to goethite. Improvement of adsorption of DWTR amended with natural zeolite. Efficient removal of metals and metalloids from surface waters and sediment porewaters with 20 mg/g added DWTR. Langmuir model to estimate maximum adsorption capacity of 40, 120, 21, and 39 for As(V), Pb(II), Cd(II), and Zn(II), respectively.                            | Chiang et al., 2012          |
| Jinan, South Korea                             | Acid and water-<br>washed and dried             | Cd(II)                                            | Synthetic<br>solutions                                         | 0 - 320 min                                     | 5.0               | Batch studies comparing sewage sludge to landfill sludge and DWTR and showing better Cd(II) adsorption (max at 42.7 mg/g) by sewage sludge.                                                                                                                                                                                                                                                                                                            | Choi and Yun, 2006           |
| Hong Kong, China<br>(Al)                       | Dried                                           | Pb(II)                                            | Synthetic<br>wastewater                                        | Not given                                       | 9.5 - 12.0        | Batch studies showing low Pb(II) removal at pH 9.7 and optimal at pH 11.6 with precipitation of Pb(OH) <sub>2</sub> in combining DWTR with fresh alum.                                                                                                                                                                                                                                                                                                 | Chu, 1999                    |
| Bradenton, USA<br>(Al)                         | Air dried                                       | Hg(II)                                            | Synthetic<br>solutions                                         | Up to 4 years                                   | Not given         | High concentration of Hg(II) adsorbed by a flooding technique on Al-DWTS over long periods. Techniques such as SEM and XPS and sequential extraction showing strong incorporation in DWTS in a residual fraction and a maximum capacity of 24 mg/g.                                                                                                                                                                                                    | Deliz Quiñones et al., 2016  |
| Beijing, China                                 | Dried, crushed,                                 | Cd(II)                                            | Synthetic                                                      | 0 - 1400 min                                    | 2.0 - 7.0         | Batch studies showing the adsorption of the three metals on the pelletized                                                                                                                                                                                                                                                                                                                                                                             | Du et al., 2020              |



|                                                                                                                          |                                                                      |                                                |                                                              |               |                       |                                                                                                                                                                                                                                                                                                                                                                                 |                                |
|--------------------------------------------------------------------------------------------------------------------------|----------------------------------------------------------------------|------------------------------------------------|--------------------------------------------------------------|---------------|-----------------------|---------------------------------------------------------------------------------------------------------------------------------------------------------------------------------------------------------------------------------------------------------------------------------------------------------------------------------------------------------------------------------|--------------------------------|
| (Al, Fe)                                                                                                                 | sieved, mixed with clay 1:2 in mass, and baked at 600°C              | Cu(II)<br>Zn(II)                               | solutions                                                    |               |                       | sorbent being pH-dependent with a maximum at pH 4.0, 5.0, and 5.0 for Cd(II), Cu(II) and Zn(II), with a capacity of 1.5, 2.8 and 1.2 mg/g, respectively. Cu being favored in competitive adsorption. Electrostatic interaction and surface complexation.                                                                                                                        |                                |
| Elbohera, Egypt (Al)                                                                                                     | Air dried, sieved <51 µm and ball milled to <100 nm as nanoparticles | Cu(II)                                         | Synthetic solutions                                          | 0 - 120 min   | 3 - 11                | Batch studies showing maximum adsorption on nano-DWTR at pH > 6.0 after 120 min with 71.9 mg/g capacity or ~3.7 times higher than with bulk particles of DWTR. Described by the Langmuir isotherms and pseudo-first-order kinetics. Possibility of reusing over 5 cycles. Also tested for the removal of indigo carmine dye and Thiamethoxam pesticide as reported in Table S4. | El-Kammah et al., 2022a        |
| Mumbai, India (Al)                                                                                                       | Oven-dried, crushed, and sieved <150 µm                              | Cu(II), Co(II), Cr(VI), Hg(II), Pb(II), Zn(II) | Synthetic solutions and wastewater                           | 0 - 480 min   | 2.5 - 8.5             | Batch and column tests showing an increase in the removal of cationic metals with increasing pH and the opposite for Cr(VI). The influence of competition in mixtures being higher at low DWTR dosages. Column test with diluted electroplating wastewater showing removal of Cu(II) at pH 6.0. Capacities of 1.7 and 3.5 mg/g for Cu(II) and Cr(VI), respectively.             | Ghorpade and Ahammed, 2018     |
| From Canada, 1. Dartmouth (Al)<br>2. Waterloo (Al)<br>3. Brandon (Ca) From USA,<br>4. Tampa Bay (Fe)<br>5. New York (Fe) | Dried at 105°C                                                       | As                                             | Synthetic solutions & ground-water (GW) from Halifax, Canada | 12 d          | 5.0 - 8.0<br>8.1 (GW) | Batch adsorption experiments showing the best removal of As by iron-based (2.23 mg/g) and lime DWTR at pH 5 and 6 as explained by more small pores in iron-based measured by porosimetry. A porous surface in iron-based DWTR revealed by SEM in comparison to a smooth surface for Al-DWTR. The 2011 paper also covering P removal as presented in Table 2.                    | Gibbons and Gagnon, 2010; 2011 |
| Bradenton, USA (Al)                                                                                                      | Air-dried and sieved to <2 mm                                        | Hg(II)                                         | Synthetic solutions                                          | 0 - 180 h     | 3.0 - 8.0             | Batch studies showing a maximum sorption capacity of 79 mg Hg/g Al-DWTR. Effective immobilization in the studied pH range. Sorption kinetic data as the best fit to a pseudo-first-order model. Potential for soil remediation.                                                                                                                                                 | Hovsepyan and Bonzongo, 2009   |
| Brisbane Australia (Al)                                                                                                  | Dried, ground, and sieved <200 µm                                    | Mo(VI), V(V), As(V), Ga(III)                   | Synthetic solutions                                          | 0 - 300 min   | 3.0 - 10.0            | Batch studies showing maximum adsorption of Mo(VI) at pH<6.0, V(V) at pH<8.0, As(V) at pH<9.0, and Ga(III) at 4.0<pH<8.0, better than other compared waste sorbents.                                                                                                                                                                                                            | Hua et al., 2015               |
| Fort Collins, USA (Al)                                                                                                   | Air-dried and sieved to <2 mm                                        | Se(IV)<br>Se(VI)                               | Synthetic solutions                                          | 0 - 28 h      | 5.0 - 9.0             | Batch studies showing no pH effect on adsorption in the tested range (~1.6 mg/g). Se(VI) adsorbed as an outer-sphere and Se(IV) as an inner-sphere complex. Adsorbed Se(IV) being reduced to Se(0) under anoxic conditions.                                                                                                                                                     | Ippolito et al., 2009          |
| 3 different plants Taiwan, China (Al, Fe)                                                                                | Washed, oven-dried, and sieved to <150 µm                            | Boron                                          | Synthetic solutions                                          | 0 - 3000 min  | 4.0 - 11.0            | Batch studies showing optimal pH adsorption at 8.2-8.5 with 0.19 to 0.98 mg/g capacities. Best adsorption by DWTR containing more Al through a combination of electrostatic and van der Waals interactions. Proposing a pseudo-second order model.                                                                                                                              | Irawan et al., 2011            |
| Go-san, South Korea (Al)                                                                                                 | Oven-dried, calcined at 300 and 500°C, pulverized                    | As(V)                                          | Synthetic solutions                                          | 0 - 24 h      | 2.0 - 12.0            | Calcination at 300°C improving the adsorption of As(V) (up to 50 mg/g) with enhanced specific surface area in batch studies, not at 500°C because of an increased crystallinity of the adsorbent. Adsorption being optimal below pH 6.                                                                                                                                          | Jeon et al., 2018              |
| Beijing, China (Al, Fe)                                                                                                  | Dried                                                                | Co(II)                                         | Synthetic solutions                                          | 0 - 100 h     | 3.0 - 8.0             | Batch studies showing adsorption equilibrium reaching after 30 h. The maximum adsorption capacity of 17.31 mg/g at pH 6 in a spontaneous endothermic process. FTIR indicating a covalent bond with Fe(Al)-O groups.                                                                                                                                                             | Jiao et al., 2017              |
| Go-san, South Korea (Al)                                                                                                 | Alone and mixed with bentonite at 0.5 and 1.0% wt.                   | As(V)                                          | Synthetic solutions and other anions                         | 10 - 1900 min | 7.0                   | Batch and column studies showing a decreased adsorption capacity with the addition of bentonite but improving compressive strength. Maximum adsorption of 22.2 mg/g pelletized adsorbent. Negligible of competing anions except for PO <sub>4</sub> <sup>3-</sup> .                                                                                                             | Jo et al., 2021a               |
| Seoul, South Korea (Al)                                                                                                  | Air dried and sieved to <850 µm, calcined at 250-                    | Fluoride                                       | Synthetic and wastewater solutions                           | 0 - 300 min   | 2.0 - 11.0            | Batch and fixed-bed studies showing best results obtained at pH 6-7 with pre-calcined DWTR at 450°C. Maximum capacity of 39.6 mg/g. Possibility of regeneration of the adsorbent. Almost no influence from co-existing anions                                                                                                                                                   | Jung et al., 2016a             |

|                                         |                                                                                                            |                                             |                                                     |                           |                             |                                                                                                                                                                                                                                                                                                                                                                                                                                            |                         |
|-----------------------------------------|------------------------------------------------------------------------------------------------------------|---------------------------------------------|-----------------------------------------------------|---------------------------|-----------------------------|--------------------------------------------------------------------------------------------------------------------------------------------------------------------------------------------------------------------------------------------------------------------------------------------------------------------------------------------------------------------------------------------------------------------------------------------|-------------------------|
|                                         | 650°C, and reacted with Ca-alginate                                                                        |                                             |                                                     |                           |                             | such as nitrate, chloride, and sulfate.                                                                                                                                                                                                                                                                                                                                                                                                    |                         |
| Go-san, South Korea (Al)                | Oven-dried, sieved at <0.15 mm, calcined at 300°C, reacted with Na-alginate and polyvinyl alcohol          | As(V)                                       | Synthetic solutions                                 | 0 - 1000 min              | -                           | Batch and column studies showing enhanced adsorption on calcined adsorbents (up to 12 mg/g) due to increased surface area of the bead by 100 fold. Adsorption kinetics being 3-21 times faster than an uncalcined bead.                                                                                                                                                                                                                    | Kang et al., 2019a      |
| Go-san, South Korea (Al)                | Sludge mixed with molasses, oven dried, calcined at 300-400°C                                              | As(V)                                       | Synthetic solutions                                 | 0 - 8 h                   | 3.0 - 10.0                  | Batch studies showing enhanced adsorption after calcination up to 35 mg/g. Pellets thermally treated under air and CO <sub>2</sub> showing 2 times faster adsorption than simply dried and in an N <sub>2</sub> medium.                                                                                                                                                                                                                    | Kang et al., 2019b      |
| Go-san, South Korea (Al)                | Composites made of DWTR & g-C <sub>3</sub> N <sub>4</sub> pyrolyzed at 550°C for 4 h and sieved at <150 µm | As(III)<br>As(V)                            | Synthetic solutions                                 | 0 - 4500 min              | 2.0 - 10.0                  | Batch studies showing maximum adsorption of As(V) at pH 2.0 under dark and light (up to 60 mg/g composite DWTR: g-C <sub>3</sub> N <sub>4</sub> at 1:0.2 ratio, and that of As(III) at pH 7.0 in light. Composite material oxidizing As(III) by photocatalytic action <i>via</i> outer-sphere complexation and adsorbing As(V) efficiently changing to inner-sphere complexation and chemisorption.                                        | Kim et al., 2020        |
| Maanshan, China (Fe, Al)                | Heated at 600°C and acidified by different [HCl]                                                           | Mo(VI)                                      | Synthetic solutions                                 | 0 - 900 min               | 1.0 - 10.0                  | Batch studies showing the optimal condition of adsorption after thermal activation for 4 h followed by activation of 4.0 M HCl with a solid-to-liquid ratio of 1:1 at low pH (2-4). Maximum capacity at 39.5 mg/g. Reduction of average pore size after heating but increase of surface areas. Possibility of regeneration.                                                                                                                | Lian et al., 2019; 2020 |
| 1. Colorado<br>2. Texas, USA (Fe)       | Wet and oven-dried                                                                                         | B(III), Cu(II)<br>Cr(VI), Pb(II),<br>Se(VI) | Synthetic solutions and reverse osmosis concentrate | 0 - 24 h                  | 5.5, 7.8                    | Continuous-flow column studies showing high removal of Cu(II) at 1.8 mg/g and Pb(II) at 22 µg/g both at pH 7.8 through inner-sphere complexes. Low removal of non-ionic B(III) at 125 µg/g, and Se(VI) at 17 µg/g, both at pH 5.5. Decreased removal of Se(VI) Cr(VI) at higher pH due to electrostatic repulsions and competition with other anions. No significant effect of water temperature, solid moisture content, or loading rate. | Lin et al., 2014        |
| 1. Bradenton (Al)<br>2. Tampa (Fe) USA  | Air dried and sieved <2 mm                                                                                 | As(III)<br>As (V)                           | Synthetic solutions                                 | 0 - 48 h                  | ~ 6<br>no control           | Batch studies showing both Al- and Fe-DWTRs showing high affinities for As(V) and As(III), with Freundlich-type adsorption. The Al-DWTR being less effective in removing As(III) and the Fe-WTR showing a greater affinity for As(III). Estimated capacity at 15 mg/g for both species.                                                                                                                                                    | Makris et al., 2006a    |
| Bradenton, USA (Al)                     | Air-dried and sieved <1 mm                                                                                 | Perchlorate ion                             | Synthetic solutions                                 | 0 - 24 h                  | Not given                   | Fast removal of perchlorate (65%) after 2 h and increasing to 76% after 24 h. Possible degradation to chloride over a longer time of 96 h.                                                                                                                                                                                                                                                                                                 | Makris et al., 2006b    |
| Bradenton, USA (Al)                     | Air dried and sieved <2 mm                                                                                 | As(III)<br>As (V)                           | Synthetic solutions                                 | 0 - 48 h                  | 6.5                         | Batch studies showing high sorption capacity for As(III) and As(V) by Al-DWTR (up to 8.0 mg/g). XAS showing As adsorbed to Al-hydroxide surfaces through strong, inner-sphere surface complexes with Al hydroxides.                                                                                                                                                                                                                        | Makris et al., 2009     |
| 14 plants, UK (Al, Fe)                  | Air-dried, ground, and sieved < 2mm                                                                        | Cd, Cr, Pb                                  | Synthetic solutions                                 | 0 - 100 h                 | 2.0 - 9.0                   | Batch studies showing maximum uptake of metals by most DWTR at pH 4 and fitting Freundlich, Langmuir, and Temkin models. Adsorption capacities being generally below 100 µg/g for the three metals. FTIR study showing possible mechanisms of adsorption.                                                                                                                                                                                  | Mohammed et al., 2016   |
| 1. Bradenton (Al)<br>2. Tampa (Fe), USA | Air dried and sieved <2 mm                                                                                 | As (V)                                      | Synthetic solutions                                 | 0 - 48 h                  | 3.0 - 9.0                   | Batch studies showing good removal of As(V) by both DWTR. At 200 g/L solid: solution ratio, maximum adsorption by Fe-DWTR was limited to pH 3-7 and 3-9 by Al-DWTR. Competing effect of phosphate but not sulfate.                                                                                                                                                                                                                         | Nagar et al, 2010       |
| Delran, USA (Al)                        | Air dried, sieved <2 mm and mixed with sand to improve hydraulic                                           | Cu(II), Pb(II)<br>Zn(II)<br>TPH             | Synthetic solutions                                 | 0 - 24 min<br>0 - 4 month | 5.8 - 6.7<br>Not controlled | Laboratory column and field studies showing higher removal of the three metals and total petroleum hydrocarbons (TPH) from synthetic stormwater when the proportion of DWTR was increased. Increased efficiency at higher pH values.                                                                                                                                                                                                       | Na Nagara et al., 2021  |

|                                              | performance                                                                          |                            |                                                |              |                                |                                                                                                                                                                                                                                                                                                                                                                                                   |                           |
|----------------------------------------------|--------------------------------------------------------------------------------------|----------------------------|------------------------------------------------|--------------|--------------------------------|---------------------------------------------------------------------------------------------------------------------------------------------------------------------------------------------------------------------------------------------------------------------------------------------------------------------------------------------------------------------------------------------------|---------------------------|
| Bridgewater, (Al)<br>USA                     | Air dried, sieved <1 mm, milled, and granulated with K-alginate and Ca <sup>2+</sup> | Cd(II), Cr(VI), Ni(II)     | Synthetic solutions                            | 0 - 36 h     | 5.2 - 7.9                      | Batch studies showing the removal of metals Cr(VI) > Cd(II) > Ni(II) through pseudo-second-order kinetic Langmuir and Freundlich models. Estimated capacities of 2.95, 2.12, and 1.23 mg/g for Cd(II), Cr(VI), and Ni(II), respectively. Removal is affected by the presence of divalent cations and anions having a strong effect on Cd(II) removal as followed by SEM and FTIR.                 | Na Nagara et al., 2022    |
| Kelantan, Malaysia (Fe)                      | Oven-dried, ground, and sieved <0.5 mm                                               | Cu(II)<br>Zn(II)           | Synthetic solutions                            | 0 - 1400 min | 1.0 - 6.0                      | Batch studies showing removal by groundwater DWTR. Best removal for both metals at pH 2.5 with 2000 mg/L solid and higher dosage for precipitation.                                                                                                                                                                                                                                               | Ngatenah et al., 2010     |
| Wroclaw, Poland, (Fe)                        | Washed, air dried, sieved <1 mm                                                      | As(III)<br>As(V)           | Synthetic solutions                            | 0 - 24 h     | 3.0 - 13.0                     | Batch studies showing high adsorption and oxidation of As(III) on FeOOH/MnO <sub>2</sub> DWTR in a two-step chemisorption process with oxidation and inner-sphere complexation. Maximum capacities at 132 and 77 mg/g for As(III) and As(V), respectively. Better adsorption at pH<10. Confirmed by XPS.                                                                                          | Ociński et al., 2016      |
| 3 locations, Japan (Al)                      | Air dried and sieved <425 µm                                                         | Fluoride                   | Synthetic solutions                            | 0 - 720 min  | 2.0 - 9.0                      | Batch studies showing maximum adsorption in pH 5.1-6.0 at a maximum of ~19 mg/g, with a rapid increase in initial minutes and a smooth increase afterward. No effect from other ions such as sulfate, nitrate, and chloride.                                                                                                                                                                      | Oh and Chikushi, 2010     |
| Changhua Taiwan, China (Fe)                  | Air-dried groundwater treatment sludge                                               | Ni(II)                     | Synthetic solutions                            | 0 - 120 min  | 4.5 - 7.5                      | Batch studies showing no pH effect in the tested range. Increased adsorption with increased initial concentration to a maximum of 11.6 mg/g. Pseudo-second-order process is described by the Freundlich model.                                                                                                                                                                                    | Ong et al., 2017          |
| 1. Bradenton (Al)<br>2. Tampa (Fe), USA      | Air dried, ground, and sieved <500 µm. Used to spike 2 Florida soils                 | As(V)                      | Synthetic solutions and various soil-solutions | 0.17 - 48 h  | ~6.0, Not imposed but measured | Incubation studies showing efficient and rapid removal of As by both DWTRs with an optimum soil-solution ratio of 1:5. All DWTR loads (2.5 to 10%) highly increasing adsorbed As(V) by both soils with capacities close to 5.0 and 3.2 mg/g for Al- and Fe-DWTR. Desorption of 50% As in high phosphate level.                                                                                    | Sarkar et al., 2007       |
| Bangkok, Thailand (Al)                       | Oven-dried, crushed, and sieved <500 µm and doped with Fe nanoparticles              | As(III)<br>As(V)           | Synthetic solutions and wastewater             | 0 - 120 min  | 2.0 - 12.0                     | Batch studies showing optimum removal of both As species at pH 3.0 with 10% wt. Fe added to DWTR. Maximum capacities of 24.2 and 35.5 mg/g for As(III) and As(V) respectively. As in wastewater stabilized after adsorption in cement.                                                                                                                                                            | Sarntanayoot et al., 2019 |
| Guwahati, India (Fe, Al)                     | Air-dried, ground, and pulverized                                                    | Fluoride                   | Synthetic solutions and ground-water           | 0 - 180 min  | 5.0 - 9.0                      | Batch studies showing excellent fluoride removal in synthetic and groundwater at pH 5-8 within 2 h. Isotherm data best fitting to Langmuir and Freundlich models and a maximum capacity of 0.298 mg/g. SEM, FTIR, and XRD showing F- attachment to metal hydroxyl and oxide groups.                                                                                                               | Shakya et al., 2019       |
| 1. Abbanoa (Al)<br>2. Bidighinzu (Fe), Italy | Dried, ground, and sieved to <0.02 mm                                                | Cd(II)<br>Zn(II)           | Synthetic solutions                            | 0 - 24 h     | 4.5, 5.5, 7.0                  | Batch studies showing better adsorption of both metals by Fe-DWTR and better at pH 7.0 linked to higher content of Fe - Mn oxides and specific surface area (maximum at ~10 and ~22 mg/g for Zn(II) and Cd(II), respectively) compared to Al-DWTR (max at ~ 6 and 10 mg/g for Zn(II) and Cd(II), respectively). Could be linked to inner-sphere complex formation and co-precipitation reactions. | Silvetti et al., 2015     |
| Sapporo, Japan (Al)                          | Washed, oven dried, crushed, and sieved <1 mm                                        | Cd(II)                     | Synthetic solutions                            | 0 - 1440 min | 2.0 - 9.0                      | Batch studies showing favorable adsorption at pH 6 to 8 with maximum capacities at 5.3 and 9.2 mg/g. Humic acid and iron oxide being key components of adsorption. Described by the Langmuir model.                                                                                                                                                                                               | Siswoyo et al., 2014      |
| Yogyakarta, Indonesia (Al)                   | Washed, dried, crushed and sieved <50 mesh                                           | Cd(II)                     |                                                | 0-24 h       | 2.0 - 8.0                      | Batch studies showing efficient Cd removal by raw, acid-modified, and encapsulated DWTR with a maximum capacity of 25, 40, and 30 mg/g, respectively at pH 7-8. Described by the Langmuir and Freundlich models.                                                                                                                                                                                  | Siswoyo et al., 2019      |
| Bridgewater, USA (Al)                        | Air dried, sieved <2mm, and ground. Glued and coated on wood mulches                 | Cu(II)<br>Pb(II)<br>Zn(II) | Synthetic stormwater                           | 0 - 120 min  | 7.0                            | Batch and column tests showing effective removal of the three metals within 120 min with maximum capacities of 9.74, 61.07, and 8.14 µg/g, respectively. Adsorption being a 2 <sup>nd</sup> order reaction for each pollutant. Also tested for phosphorus as shown in Table 2.                                                                                                                    | Soleimanifar et al., 2016 |

|                           |                                                                                             |                                               |                               |                   |                          |                                                                                                                                                                                                                                                                                                                                                                         |                               |
|---------------------------|---------------------------------------------------------------------------------------------|-----------------------------------------------|-------------------------------|-------------------|--------------------------|-------------------------------------------------------------------------------------------------------------------------------------------------------------------------------------------------------------------------------------------------------------------------------------------------------------------------------------------------------------------------|-------------------------------|
| São Carlos, Brazil (Al)   | Oven dried and milled compared to soil                                                      | Pb(II)<br>Cd(II)                              | Synthetic solutions and soils | 0 - 72 h          | 5.0                      | Batch studies showing the adsorption of both metals to DWTR much better than to soil (maximum capacities of 15.67 and 1.04 mg/g for Pb(II) and Cd(II), respectively. In 1:1 DWTR : soil mixture, the bioaccessibility assay showing a reduction of 28.8 and 34.5% for Pb(II) and Cd(II), respectively.                                                                  | Souza et al., 2019            |
| Visakhapatnam, India (Al) | Oven-dried, crushed, calcined at 400°C for 3h, and sieved <100 µm                           | Fluoride                                      | Synthetic solutions           | 0 - 240 min       | 3.5 - 8.8                | Batch studies showing optimal removal of fluoride ions at pH 6 being rapid in the first 5 min and reaching equilibrium at 240 min. Adsorption following first-order kinetics and described by the Langmuir model and the maximum capacity estimated at 5.394 mg/g.                                                                                                      | Sujana et al., 1998           |
| Brisbane, Australia (Al)  | Oven-dried, ground, and sieved <1 mm as a soil amendment                                    | As,<br>Cd                                     | Synthetic solutions and soils | 7 weeks of growth | Acidic soils 5.2 and 5.9 | Sandy loam soils amended with 2–4 wt% DWTR significantly reducing Cd and As availability and uptake by vegetable <i>B. pkinensis</i> and not limiting P uptake by plants as reported in Table 2.                                                                                                                                                                        | Tay et al., 2017              |
| Sivas, Turkey (Fe)        | Washed, oven dried, pulverized, and sieved <1 mm                                            | Ni(II)                                        | Synthetic solutions           | 0 - 24 h          | 3.0 - 7.0                | Batch tests showing optimized removal of Ni(II) at pH 6-7 with capacity at 6.97 mg/g. Conditions of adsorption and types of interaction studied by SEM, FTIR, and AFM. Langmuir and Freundlich as better models to describe the process.                                                                                                                                | Yildiz and Sevinç, 2018       |
| Harbin, China (Fe)        | Dried, ground, sieved to <100 mesh, and mixed with chitosan to produce granulated particles | As(V)                                         | Synthetic solutions           | 0 - 48 h          | 3.0 - 11.0               | Batch and column studies showing better removal at pH<6.5 and higher granules dosage with maximum capacity at 14.95 mg/g. Little effect of Ca <sup>2+</sup> and Mg <sup>2+</sup> but a competing effect of some anions at higher concentrations. A better description of the process by the Langmuir model. Possibility of regeneration and reuse of the sorbent.       | Zeng et al., 2020             |
| Brisbane, Australia (Al)  | Dried                                                                                       | Cr(III)<br>Cr(VI)<br>Pb(II)                   | Synthetic solutions           | 0 - 360 min       | 2.0 - 9.0                | Batch studies showing better adsorption of cations at pH>6 and pH=3 for Cr(VI). Described by Freundlich and Langmuir models and correlated to a pseudo-second-order kinetic model for Cr(III) and Pb(II). Maximum capacities at 62.2, 19.2, and 10.9 mg/g for Pb(II), Cr(III), and Cr(VI), respectively. Possible regeneration of surface using 0.1M HNO <sub>3</sub> . | Zhou and Haynes, 2010b; 2011a |
| Brisbane, Australia (Al)  | Dried, ground, and sieved <125 µm                                                           | Cd(II), Cr(III),<br>Cu(II), Pb(II),<br>Zn(II) | Synthetic solutions           | 2 h               | 4.0, 6.0,<br>8.0         | Comparison of 7 solid wastes including DWTR in batch studies. The magnitude of sorption at pH 6.0 followed the general order: Cr(III) ≥ Pb(II) ≥ Cu(II) > Zn(II) = Cd(II). Maximum adsorption capacities of ~100 and 12 mg/g for Pb(II) and Cd(II), respectively. Possible regeneration of DWTR by acid treatment.                                                      | Zhou and Haynes, 2011b        |

Abbreviations: AFM: Atomic Force Microscopy; FTIR: Fourier Transform Infra Red Spectroscopy; SEM: Scanning Electron Microscopy; XAS: X-ray Absorption Spectroscopy; XPS: X-ray Photoelectron Spectroscopy; XRD: X-ray Diffraction Spectroscopy.

Table S3. Conditions of DWTR utilization for the removal or control of phosphorus and phosphorus compounds from various environments.

| Origin/<br>Based Al, Fe,<br>or Ca | Treatment/<br>Modification                              | Treated<br>systems                                                                                      | Tested<br>contact<br>time                     | Tested pH                | Main observations and comments                                                                                                                                                                                                                                                                                                                          | Reference                         |
|-----------------------------------|---------------------------------------------------------|---------------------------------------------------------------------------------------------------------|-----------------------------------------------|--------------------------|---------------------------------------------------------------------------------------------------------------------------------------------------------------------------------------------------------------------------------------------------------------------------------------------------------------------------------------------------------|-----------------------------------|
| Holland, USA<br>(Al)              | Dried before application                                | Added to soils to<br>remove excess P                                                                    | 0 - 7.5 y                                     | Soil at pH 6.4<br>& 6.8  | The concentration of water-soluble P reduced by $\geq 60\%$ over 7.5 y and DWTR-immobilized P remaining stable over the same period.                                                                                                                                                                                                                    | Agyin-Birikorang et al.,<br>2007  |
| 17 plants, UK<br>(Al, Fe)         | Air-dried, ground, and<br>sieved <2 mm                  | Synthetic<br>solutions of<br>different [P]                                                              | 48 h                                          | 4.0, 7.0, 9.0            | Batch studies showing Al-based DWTR tending to have higher P retention due to higher specific surface areas than Fe-DWTR. P retention up to 26.95 mg/g Al-DWTR. Data being generally well fitting to the Freundlich model. Surface complexation, ligand exchange, and precipitation.                                                                    | Al-Tahmazi and<br>Babatunde, 2016 |
| Kildare, Ireland,<br>(Al)         | Dried, ground, and used<br>particles of 1.18 mm<br>avg. | Condensed<br>phosphate with<br>( $\text{NaPO}_3$ ) <sub>12-13</sub> · $\text{Na}_2\text{O}$<br>as model | 48 h (batch)<br>140 d<br>(continuous<br>flow) | 4.0 - 9.0                | Increased P removal with increasing DWTR dosage in batch and column trials. The maximum adsorption capacity of condensed phosphate of 4.52 mg/g at pH 4.0. In continuous flow, P removal efficiency decreasing when P loading increasing. The process is described by the Langmuir model.                                                               | Babatunde et al., 2008            |
| Kildare, Ireland<br>(Al)          | Air-dried, ground, and<br>sieved <2 mm                  | Synthetic<br>solutions of<br>different [P]                                                              | 0 – 120 h                                     | 4.0, 7.0, 9.0            | Specific surface area ranging from 28.0 to 41.4 m <sup>2</sup> /g. Significant P removal achieved in batch and long-term column experiments at pH 5.9-6.0 with a maximum capacity of 31.9 mg/g.                                                                                                                                                         | Babatunde et al., 2009            |
| Kildare, Ireland,<br>(Al)         | Air-dried, ground, and<br>sieved<br>0.5 -1.18 mm        | Laboratory<br>constructed<br>wetland                                                                    | 1 - 91 d                                      | 7.81 (Initial)           | Under specific conditions (loading rate of 1.27 m <sup>3</sup> /m <sup>2</sup> d & organic loading rate of 279.4–774.7 g-BOD <sub>5</sub> /m <sup>2</sup> d and 361.1–1028.7 g-COD/m <sup>2</sup> d), the wetland system achieving high removal efficiencies for BOD <sub>5</sub> (90.6%), COD (71.8%), reactive P (80%), and soluble reactive P (89%). | Babatunde et al., 2010            |
| Beijing, China<br>(Al, Fe)        | Air-dried, ground, and<br>sieved <2 mm                  | Urban wastewater<br>with various<br>loading of DWTR<br>and P conc.                                      | 0 - 300 min                                   | 7.80                     | In a continuously stirred tank reactor, 94% of P being removed from urban wastewater at an initial [P] of 10 mg/L for 2 h in a DWTR dosage of 10 g/L. Low leaching of trace metals.                                                                                                                                                                     | Bai et al., 2014a                 |
| Beijing, China<br>(Al, Fe)        | Dewatered DWTR                                          | Lab-scale<br>constructed<br>wetlands in<br>continuous & tidal<br>flow for secondary<br>effluent.        | 0 - 260 d                                     | 7.0 - 8.5                | BOTH continuous flow operation and tidal flow operation systems efficiently removing nutrients TN (76%), TP (98%), and chemical oxygen demand and suspended solids in constructed wetlands to treat secondary effluents. Low leaching of Fe and Al.                                                                                                     | Bai et al., 2014b                 |
| Perth, Australia<br>(Al, Fe)      | Oven-dried, crushed,<br>and sieved <600 $\mu\text{m}$   | Synthetic and<br>second-effluent<br>wastewater                                                          | 0 - 24 h                                      | 4.0 - 9.0                | Batch studies showing better and faster P removal by DWTR with higher Al content. One DWTR showing a maximum adsorption capacity of 41.67 mg/g. Pseudo-second-order kinetic well fitted for all sludge samples.                                                                                                                                         | Bal Krishna et al., 2016          |
| Fort Collins, USA<br>(Al)         | Mixed with swine<br>wastewater as a source<br>of P.     | Tested in a<br>greenhouse to<br>grow spring wheat<br>in comparison to<br>fertilizer                     | 128 d                                         | Soil at pH<br>8.1 - 8.4  | The capacity of the mixture to supply P depending on soil type and being comparable to P-fertilizer in low clay soils. The mixture not affecting soil organic P uptake but increasing phosphatase activity in soils. Al-DWTR as an efficient P fertilizer.                                                                                              | Banet et al., 2020                |
| Arcadia (Al)<br>Tampa (Fe) USA    | Dried, crushed, and<br>sieved 420-595 $\mu\text{m}$     | River and organic<br>lake waters                                                                        | 0 - 60 min                                    | Water at pH<br>7.0 - 7.8 | Comparison of several low-cost adsorbents in jar and column tests. The Al-based DWTR being the best-performing material for P removal.                                                                                                                                                                                                                  | Boyer et al., 2011                |
| Ireland<br>(Al, Fe)               | Oven-dried, crushed,<br>and sieved <0.5 mm              | Synthetic<br>wastewater                                                                                 | 0 - 24 h &<br>long term                       | 8.1 (initial pH)         | Data of different parameters used to model long-term phosphorus removal.                                                                                                                                                                                                                                                                                | Callery et al., 2016              |
| Akron, USA<br>(Al)                | Used as such                                            | Synthetic<br>solutions and<br>surface water                                                             | 0 - 720 h<br>28 d<br>(long-term)              | ~7.0                     | Batch and column experiments showing more efficient P adsorption on DWTR than activated carbon. Theoretical phosphate uptake of 9.0 mg/g Al-DWTR. P adsorption decreasing with increasing pH.                                                                                                                                                           | Carleton and Cutright,<br>2020    |
| 1. Abbanoa (Al)                   | Dried, ground, and                                      | Synthetic                                                                                               | 0 - 1500 min                                  | 4.0, 7.0, 9.0            | Batch studies showing better removal by Fe-DWTR compared to Al-                                                                                                                                                                                                                                                                                         | Castaldi et al., 2014             |

|                                                                                                                                |                                                                              |                                                              |                       |                        |                                                                                                                                                                                                                                                                                                                                                                      |                                                           |
|--------------------------------------------------------------------------------------------------------------------------------|------------------------------------------------------------------------------|--------------------------------------------------------------|-----------------------|------------------------|----------------------------------------------------------------------------------------------------------------------------------------------------------------------------------------------------------------------------------------------------------------------------------------------------------------------------------------------------------------------|-----------------------------------------------------------|
| 2. Sassari (Fe), Italy                                                                                                         | sieved to <0.02 mm                                                           | solutions                                                    |                       |                        | DWTR. Proposing inner-sphere complexes by FT-IR. Max at pH 4.0 and decreasing toward pH 9.0. Also testing As(V) and reported in Table S2.                                                                                                                                                                                                                            |                                                           |
| Trinidad (Al, Fe, Ca)                                                                                                          | Oven-dried, crushed, and sieved <2.36 mm                                     | Synthetic solutions                                          | 0 - 24 h              | 2.0 - 10.0             | Batch studies showing good adsorption by Al-DWTR at pH 4.0 and best at pH 8.0 for Fe- and Ca-DWTR. The diffusion chemisorption model producing the best description of the process.                                                                                                                                                                                  | Chittoo and Sutherland, 2014                              |
| Rock Hall, USA (Al, Fe)                                                                                                        | Dried, ground, and sieved to <250 µm                                         | Soils amended with poultry litter and litter                 | 2 - 7 weeks           | Soils at pH 4.6 to 5.6 | Incubation studies showing increased rates of application of DWTR increasing the litter and soil pH and reducing water-soluble P. Similar results with Fe-rich residues. The 2002 study showing that reducing water-soluble P not severely impacting soil fertility. The 2005 study showing the addition of DWTR to poultry litter effectively reducing P in runoff. | Codling et al., 2000; Codling and Isensee, 2005           |
| 21 samples, Oklahoma, USA (Al, Fe)                                                                                             | Dried, ground, and sieved to <2 mm                                           | Sorption tested and runoff from poultry litter               | 12 min for adsorption | 5.3 - 8.2              | Variable P sorption capacity depending on the source of DWTR. Reduction of P runoff from 14 to 85% correlated to P level and extractable Al.                                                                                                                                                                                                                         | Dayton et al., 2003                                       |
| El-bohera, Egypt (Al)                                                                                                          | Air-dried, ground, sieved <51 µm and ball milled to <100 nm as nanoparticles | Synthetic solutions                                          | 24 h                  | 3.0 - 11.0             | Nanoparticles being more efficient (30-fold) for P sorption at 50 mg/g than bulk DWTR and showing low release from P-saturated solids. Maximum adsorption at pH 3.0 and competing effect of arsenate ions. Described by the Freundlich model.                                                                                                                        | Elkhatib et al., 2015                                     |
| Bradenton, USA (Al, Fe, Ca)                                                                                                    | Dried                                                                        | Used to test P solubility and leaching in P-amended soils    | 0 - 24 h<br>4 months  |                        | Batch and greenhouse tests showing the ability to reduce soluble P as : Al-DWTR > Ca-DWTR > Fe-DWTR. In the greenhouse and absence of DWTR, an important % of P-source in bio-solids leached over 4 months.                                                                                                                                                          | Elliott et al, 2002                                       |
| Kluizen, Belgium (Al)                                                                                                          | Oven-dried, milled to 1-4 mm, and calcined in granules at 100-600°C          | Synthetic solutions and pilot-plant setup                    | 0 - 24h               | 4.0 - 9.0              | Batch studies showing superior adsorption capacity by the granules calcined at 550°C at initial pH of 4.0. Pilot-scale column test showing the 550 material removing P from a P-rich surface water stream at a flow rate of 200 L/h, at >86% throughout the experiment.                                                                                              | Everaert et al., 2021                                     |
| Oklahoma, USA (Al)                                                                                                             | Not mentioned                                                                | Added to poultry litter-containing soils                     | 24 h                  | Initial pH 7.3         | Higher addition of DWTR reducing dissolved P in the runoff by 42% attributed to Al and soluble NH <sub>4</sub> -N by 64%. Land application not increasing dissolved solids or Al in surface runoff.                                                                                                                                                                  | Gallimore et al., 1999                                    |
| Beijing, China (Fe, Al)                                                                                                        | Air-dried, ground, and sieved to <80 mesh                                    | Synthetic solutions                                          | 0 - 48 h              | 5.0, 7.0, 9.0          | Batch tests showing strong adsorption ability for 3 forms of P being maximum at pH 5.0 and decreasing with pH increase. Described by a pseudo-second-order model and Langmuir isotherm.                                                                                                                                                                              | Gao et al., 2013                                          |
| Athens, Greece (Al)                                                                                                            | Dried                                                                        | Synthetic and real wastewater                                | 0 - 90 min            | 6.0                    | Batch studies showing pure Al, Fe, and Ca salts being more efficient P adsorbents than DWTR in synthetic and real wastewater both at pH 5-6. Phosphate removal being associated with the release of OH ions in the solution.                                                                                                                                         | Georganas and Grigoropoulou, 2005; Georganas et al., 2006 |
| 4 locations, Canada (Al, Fe, Ca)                                                                                               | Oven-dried, crushed, and sieved in 3 sizes                                   | Synthetic solutions and municipal wastewater                 | 0 - 12 d              | 6.2<br>6.8             | Batch tests showing ferric DWTR presenting the highest adsorptive capacity followed by the Ca-based DWTR. Ca- and Al-based DWTR showing higher adsorption rates in synthetic solutions. Langmuir isotherms.                                                                                                                                                          | Gibbons et al., 2009                                      |
| From Canada,<br>1. Dartmouth (Al)<br>2. Waterloo (Al)<br>3. Brandon (Ca)<br>From USA,<br>4. Tampa Bay (Fe)<br>5. New York (Fe) | Oven-dried, crushed, and sieved in 3 sizes                                   | Synthetic solutions and spiked municipal wastewater effluent | 12 d                  | 6.2<br>6.8             | Batch tests showing ferric DWTR showing the highest adsorptive capacity followed by the Ca-based DWTR as explained by porosity measurements. Langmuir isotherm. The study also including As(V) adsorption as reported in Table 1.                                                                                                                                    | Gibbons and Gagnon, 2011                                  |

|                                                                                       |                                                                                         |                                                                                  |                             |                            |                                                                                                                                                                                                                                                                                                                       |                                                      |
|---------------------------------------------------------------------------------------|-----------------------------------------------------------------------------------------|----------------------------------------------------------------------------------|-----------------------------|----------------------------|-----------------------------------------------------------------------------------------------------------------------------------------------------------------------------------------------------------------------------------------------------------------------------------------------------------------------|------------------------------------------------------|
| 1. Yu Qing (Al)<br>2. Que He (Al, Ca)<br>3. Xue Shan (Ca)<br>4. Sun He (Al),<br>China | Dried                                                                                   | Synthetic solutions                                                              | 0 - 48 h                    | Not mentioned              | Batch studies showing good P adsorption (up to 6.06 mg/g DWTR), with all samples with the largest capacity of the samples containing more Al. Sequential extraction showing most P forms in inorganic fractions. Better described by pseudo-second order equations.                                                   | Hou et al., 2018                                     |
| Gold Coast, Australia (Al)                                                            | Dried, ground, and sieved <2 mm                                                         | Synthetic solutions and wastewater effluents                                     | 10 h & 48h, continuous flow | 6.5 - 7.1 (variation)      | Rapid P removal (~ 55%) in the first 20 min. in a small-scale continuous flow experiment. Concomitant release of ammonia and nitrate.                                                                                                                                                                                 | Huang and Chiswell, 2000                             |
| Englewood, USA (Al)                                                                   | Air-dried and sieved to 1.0 - 0.3 mm                                                    | Synthetic solutions and river water                                              | 0 - 211 d                   | 7.2 - 8.2 (variation)      | Batch tests showing a decrease of P content with pH increase during shaking being attributed to the formation of calcium phosphate and not to the release of P in solution. Maximum capacity at 12.5 mg/g.                                                                                                            | Ippolito et al., 2003                                |
| Go-san, South Korea (Al)                                                              | Mixed with charcoal and bentonite in a pellet                                           | Synthetic solutions of NH <sub>4</sub> <sup>+</sup> , phosphate, and antibiotics | 0 - 1560 min                | 7.5                        | Batch and column studies showing pellet adsorbent removing 47 and 71% of ammonium and phosphate, respectively. Also efficient to remove sulfathiazole and sulfamethoxazole from solutions as reported in Table 3.                                                                                                     | Jo et al., 2021b                                     |
| Seoul, South Korea (Al)                                                               | Air dried and sieved to <850 µm. Calcined at 200-800°C                                  | Synthetic solutions                                                              | 0 - 60 h                    | 2.0 – 10.0                 | Batch tests showing best adsorption results (29.42 mg/g) with DWTR-calcined at 310°C and pH 4.0. Negligible influence of competing anions in the P adsorption process. Described by the Freundlich model.                                                                                                             | Jung et al., 2016b                                   |
| Derbyshire, UK (Fe)                                                                   | Used as such or acidified-recovered                                                     | Municipal wastewater                                                             | 0 - 120 min<br>0 - 24 h     | 1.0 - 4.5                  | Batch studies showing improvement of P removal and kinetics when using acidified and ultra-filtered recovered coagulants.                                                                                                                                                                                             | Keeley et al., 2016                                  |
| Chungju, South Korea (Al)                                                             | Dried, ground, and sieved <2 mm                                                         | Synthetic solutions                                                              | 32 min<br>12 h              | 3.0 - 12.0                 | Batch and column experiments showing the highest P removal at pH 3.0 (max. of 25 mg/g), more efficient removal of inorganic P vs organic forms.                                                                                                                                                                       | Kim et al., 2003                                     |
| Florida, USA (Ca, Fe)                                                                 | Tested to be added to wetlands                                                          | Agricultural and municipal wastewater                                            | 52 weeks                    | 6.7 - 7.4 (wastewater)     | Constructed wetland tests showing soluble and total P reduced by 95% in secondary municipal wastewater. Soluble and total P reduced by 18 and 53% in anaerobically dairy wastewater.                                                                                                                                  | Leader et al., 2005                                  |
| Singapore (Al)                                                                        | Air-dried, crushed, and sieved to different sizes                                       | Synthetic solutions                                                              | 0 - 24 h                    | 4.0, 7.0, 9.0              | Batch and column studies showing maximum adsorption at pH 4.0 and 40°C. Best adsorption with smallest sizes and decreasing with increasing size. Maximum capacity of 15.57 mg/g.                                                                                                                                      | Lee et al., 2015                                     |
| Beijing, China (Fe, Al)                                                               | Al dried, crushed, sieved <125 µm and granulated with Na-alginate and FeCl <sub>3</sub> | Synthetic solutions                                                              | 0 - 72 h                    | 3.0 - 11.0                 | Batch studies showing granulation of DWTR stabilizing the initial metal content and offering strong P adsorption attributed to the formation of Fe- and Al-phosphate. Possibility of recycling. Described by Langmuir and Freundlich models.                                                                          | Li et al., 2018                                      |
| Beijing, China (Fe, Al)                                                               | Al dried, crushed, sieved <125 µm and granulated with polyvinyl alcohol                 | Synthetic solutions                                                              | 0 - 72 h                    | 3.0 - 11.0                 | Batch studies showing granulation of DWTR stabilizing the initial metal content and offering strong P adsorption (23.34 mg/g) attributed to the presence of micro- and mesoporous structures induced during a freeze-thaw preparation process. Possibility of recycling. Described by Langmuir and Freundlich models. | Li et al., 2020                                      |
| El-bohera, Egypt (Al)                                                                 | Air-dried and sieved <1 mm                                                              | Added to 3 types of soils                                                        | 60 d                        | 7.7 - 8.1 (soil pH)        | Incubation and greenhouse tests showing that adding DWTR at 30 g/kg in soils as increasing dry matter yield and plant P concentrations in the plant (shoots and roots).                                                                                                                                               | Mahdy et al., 2007                                   |
| 4 locations (Al)<br>3 locations (Fe),<br>USA                                          | Air dried and sieved <2 mm                                                              | Synthetic solutions to test the long-term stability of adsorption                | 0 - 80 d                    | 5.8 - 8.3 (not controlled) | Batch studies showing a strong affinity of P for DWTR (9.1 mg/g), higher for Al-based. Slow P sorption kinetics by DWTR suggesting intra-particle diffusion in micro-pores and long-term stability of the adsorption process.                                                                                         | Makris et al., 2004; 2005; Makris and O'Connor, 2007 |
| Islamabad,                                                                            | Oven-dried, crushed,                                                                    | Synthetic                                                                        | 0-360 min                   | 3.0 - 9.0                  | Batch tests showing maximum P removal at pH 4.0 and 5.5 with two                                                                                                                                                                                                                                                      | Maqpool et al., 2015                                 |

|                                                      |                                                                                     |                                               |                                   |                            |                                                                                                                                                                                                                                                                                                                                                                   |                                       |
|------------------------------------------------------|-------------------------------------------------------------------------------------|-----------------------------------------------|-----------------------------------|----------------------------|-------------------------------------------------------------------------------------------------------------------------------------------------------------------------------------------------------------------------------------------------------------------------------------------------------------------------------------------------------------------|---------------------------------------|
| Pakistan, (Al)                                       | and sieved to <2 mm                                                                 | solutions and municipal wastewater            |                                   |                            | different DWTRs. Optimized conditions removing 90% dissolved P and 70-80% condensed P from wastewater. Process better described by the Langmuir model.                                                                                                                                                                                                            |                                       |
| São Paulo, Brazil, (Fe)                              | As such                                                                             | Added to municipal wastewater treatment plant | Over a 4-y period                 | Not given                  | The addition of DWTR to wastewater plants increasing removal efficiencies for solids (93%-96%), organic matter (92%-94% for BOD), and phosphorus (52%-88%), when compared to the period without DWTR addition.                                                                                                                                                    | Marguti et al., 2018                  |
| Halifax, Canada (Al)                                 | Air-dried, crushed, and sieved <1.25 mm                                             | Aquaculture wastewater and municipal effluent | -                                 | 3.0 - 7.0                  | Batch and fixed bed column tests showing 94-99% P and organic matter removal using 4-16g/L DWTR. Described by the Freundlich model.                                                                                                                                                                                                                               | Mortula and Gagnon, 2007a; b          |
| Surat, India (Al)                                    | Added for coagulation                                                               | Urban wastewater                              | Continuous flow                   | 4.0 - 11.0                 | Batch tests showing high removal of COD and turbidity at a DWTR dose of 15 g/L and pH 9. Optimum conditions gave 79% P, 84% suspended solids, 78% BOD, and 99.7% total coliform removal from urban wastewater.                                                                                                                                                    | Nair and Ahammed, 2015                |
| Meet Khames, Egypt (Al)                              | Oven-dried                                                                          | Synthetic solutions                           | 0 - 60 min                        | 2.0 - 11.0                 | Batch studies showing maximum and fast P removal at pH 5.0 and 75°C in the first 20 min of contact. The process described by both Langmuir and Freundlich models.                                                                                                                                                                                                 | Nawar et al., 2015                    |
| Victoria, Australia (Al) 4 locations of various ages | Oven dried and sieved to different sizes                                            | Synthetic solutions                           | 0-24 h                            | 4.0-7.0                    | Batch studies showing no influence of age on adsorption. Highest adsorption of 6.7 mg/g at pH 4.0. The second smallest fraction of 1.18 mm showing the highest adsorption.                                                                                                                                                                                        | Nguyen et al., 2022a                  |
| Morgan, Australia (Fe)                               | Aggregate of 2 - 5 mm                                                               | Loaded with synthetic solutions               | 31 d                              | 6.2 - 6.7 (initial values) | Constructed apparatus simulating the addition of DWTR on soils showing a strong capacity to remove P under aerobic and anaerobic conditions.                                                                                                                                                                                                                      | Oliver et al., 2011                   |
| Bangkok, Thailand (Al)                               | Dried, crushed, and sieved 0.3 - 0.6 mm and 0.6 mm                                  | Synthetic solutions and wastewater            | 0 - 6 h<br>0 - 125 d<br>0 - 200 d | -                          | Batch and column experiments comparing DWTR and oyster shells showing effective P removal faster for DWTR and more efficient with smaller sizes. Adaptable to constructed wetland systems.                                                                                                                                                                        | Park and Polprasert, 2008; Park, 2009 |
| Dublin, Ireland (Al)                                 | Dried, crushed, and sieved <2.36 mm                                                 | Synthetic solutions                           | 0 - 24h                           | 4.0 - 9.0                  | Batch and continuous flow experiments showing the highest adsorption at pH 4.0 for o-phosphate to a maximum of 10.2 mg/g. Stability of DWTR bed over 30 d to remove 80% P.                                                                                                                                                                                        | Razali et al., 2007                   |
| Australia (Fe)                                       | Thickened sludge                                                                    | Added to urban wastewater                     | 0 - 810 d                         | 7.2                        | Laboratory-scale with in-sewer addition of Fe-DWTR showing a decrease of P and dissolved sulfide and an increase of total COD and total solids.                                                                                                                                                                                                                   | Rebosura Jr. et al., 2020; 2021       |
| Dublin, Ireland (Al)                                 | Oven-dried, crushed, and sieved to 3 different fractions and mixed with Ca-alginate |                                               | 0 - 124 h                         | 3.1 - 12.0                 | Batch tests showing maximum P adsorption on pelletized beads of 3.1 mm with 2%(w/v) DWTR at pH 3.1. Smaller bead size, higher DWTR levels, and acidic pH conditions resulting in greater P adsorption rates and capacity (19.42 mg/g). Fits the intra-particle diffusion model and pseudo-second-order kinetic model with both Langmuir and Freundlich isotherms. | Shen et al., 2018                     |
| Dublin, Ireland (Al)                                 | Used as such                                                                        | Synthetic solutions                           | 0 - 130 d                         | Monitored                  | Simulation tests showing DWTR as an adsorption matrix with aeration in floating treatment wetlands improving the concurrent removal of COD, TN, and TP, with average rates of 88%, 85%, and 90.2%, respectively.                                                                                                                                                  | Shen et al., 2019b                    |
| Brisbane, Australia (Al)                             | Oven-dried, ground, and sieved <1 mm used as a soil amendment                       | Synthetic solutions and soils                 | 7 weeks of growth                 | Acidic soils 5.2 and 5.9   | Sandy loam soils amended with 2-4 wt% DWTR significantly reducing Cd and As availability and uptake by vegetable <i>B. pekinensis</i> (see Table 1) and not limiting P uptake by plants.                                                                                                                                                                          | Tay et al., 2017                      |
| Chuncheon, South Korea (Al)                          | Pulverized, air and oven dried, also pyrolyzed at 500 & 700°C for 1 h               | Synthetic solutions                           | 0 - 48 h                          | 4.0 - 10.0                 | Batch tests showing maximum adsorption at pH 4.0. Faster kinetics and most effective P removal with DWTR pyrolyzed at 700°C. The similar adsorption capacity for air-dried and pyrolyzed DWTR. Chemisorption being the operative mechanism in the pseudo-second-order model.                                                                                      | Van Truong and Kim, 2021              |
| Beijing, China (Fe, Al)                              | Air dried, crushed, sieved <1 mm, activated                                         | Synthetic solutions                           | 0 - 64 h                          | 3.0 - 9.0                  | Batch tests showing enhanced P adsorption by heat and acid activation as compared to un-activated WTR. Maximum adsorption at acidic conditions                                                                                                                                                                                                                    | Wang et al., 2011                     |



|                             |                                                                                                                   |                                                           |                                    |                                           |                                                                                                                                                                                                                                                                                                                              |                                                       |
|-----------------------------|-------------------------------------------------------------------------------------------------------------------|-----------------------------------------------------------|------------------------------------|-------------------------------------------|------------------------------------------------------------------------------------------------------------------------------------------------------------------------------------------------------------------------------------------------------------------------------------------------------------------------------|-------------------------------------------------------|
|                             | at 600°C, and treated with HCl 0.1 - 3.0 M                                                                        |                                                           |                                    |                                           | and decreasing with pH increase. Two-site Langmuir model. Activated DWTR maintained high P removal under different redox conditions.                                                                                                                                                                                         |                                                       |
| Beijing, China (Fe, Al)     | Air dried, crushed, sieved <1 mm, citric, oxalic, and tartaric acids added                                        | Synthetic solutions                                       | 0 - 61 d                           | 5.0, 7.0, 9.0                             | Batch and column experiments showing that the effects of adding organic acids changing from inhibition to promotion with an increase in adsorption time. With pH increase, the inhibitory action of organic acids on P adsorption decreasing gradually changing and promoting adsorption.                                    | Wang et al., 2012a                                    |
| Nanjing, China (Al)         | Oven-dried, crushed, sieved <100 mesh, and granulated at high T with organic binders                              | Synthetic solutions                                       | 24 h                               | 7.0                                       | Batch tests showing granulation with the best binder being AlCl <sub>3</sub> at a mass ratio of 8% and the best P removal rate being 87.71%. Starch being the best pore-forming agent at the optimum dosage of 4%. The optimal roasting temperature being at 500°C for 2 h.                                                  | Wu et al., 2019                                       |
| Dublin, Ireland (Al)        | Air-dried, crushed, and sieved to different sizes                                                                 | Synthetic solutions                                       | 0 - 48h                            | 4.3 - 9.0                                 | Batch tests showing higher adsorption at pH 4.3 and by smaller particles. Not a significant effect of competing anions. A separate study showing a slight increase in P adsorption over an 18-month aging of DWTR.                                                                                                           | Yang et al., 2006a; b; 2008                           |
| Xi'an, China (Al)           | Air-dried, crushed, and sieved to 2-50 mm                                                                         | Municipal water in a laboratory-scale constructed wetland | 0 - 190 d                          | Not given                                 | Laboratory scale constructed wetland system showing high removal (99.5%) of P over the period. Removal efficiencies of 65% for chemical oxygen demand(COD), 68% for biological oxygen demand (BOD <sub>5</sub> ), and 34% nitrogen with a tidal flow strategy to enhance the wetland aeration.                               | Yang et al., 2011                                     |
| Suzhou, China (Al, Fe)      | Air-dried, crushed, and sieved. One portion calcined at 500°C, one acidified and one calcined after acidification | Synthetic solutions, lakewater, and domestic sewage.      | 0 - 220 min                        | 2.5 - 11.0                                | Acidification of DWTR caused a decrease in Al and Fe content. Batch test showing very efficient P removal from the synthetic, lake, and sewage water by acidified and calcined after acidification DWTR at optimum adjusted pH 4-6.                                                                                          | Yang et al., 2014                                     |
| Dublin, Ireland (Al)        | Air dried                                                                                                         | Synthetic solutions                                       | Up to 80 d                         | 4.0 - 9.0                                 | Efficient adsorption of P (up to 15.90 mg/g DWTR at pH 4.0). Freundlich as the best model to describe the process and Langmuir and Temkin being also appropriate.                                                                                                                                                            | Zhao et al., 2007                                     |
| Dublin, Ireland (Al)        | Air-dried, crushed, and sieved to 1.18-2.36 mm                                                                    | Synthetic solutions<br>Wastewater from reed bed systems   | 0 - 38 d<br>0 - 193 d              | 4.3 - 9.0<br>7.3 influent<br>7.1 effluent | Laboratory simulations through vertical and horizontal flow showing efficient removal of P and organic carbon with a decrease of COD and BOD <sub>5</sub> from synthetic solutions and wastewater. Optimal pH at 4.3. Separate studies showing similar results with DWTR from different sources.                             | Zhao et al., 2008; 2009; Zhao et al., 2010 a; b; 2011 |
| Sea of Galilee, Israel (Al) | Air dried, crushed, and sieved <2 mm.                                                                             | Modified with soil leachate and dairy wastewater          | 1 - 7 d<br>1 - 62 h for desorption | 7.5                                       | Batch studies showing the original non-treated DWTR showing an excellent capacity of P removal and, DOC to a lesser extent, from wastewater. However, the organically modified DWTR showing better slow desorption capacity tending to retain soluble reactive P and release OM and making it a good candidate for P supply. | Zohar et al., 2017                                    |

Table S4. Conditions of adsorption of other substances by DWTR and main observations.

| Origin /<br>(Based on<br>Al, Fe or, Ca) | Treatment /<br>Modification                                                                             | Substance                                                                                          | Medium<br>tested                                    | Tested<br>contact<br>time  | Tested pH                                    | Main observations and comments                                                                                                                                                                                                                                                                                                                            | Reference                    |
|-----------------------------------------|---------------------------------------------------------------------------------------------------------|----------------------------------------------------------------------------------------------------|-----------------------------------------------------|----------------------------|----------------------------------------------|-----------------------------------------------------------------------------------------------------------------------------------------------------------------------------------------------------------------------------------------------------------------------------------------------------------------------------------------------------------|------------------------------|
| Adana, Turkey<br>(Fe)                   | Oven-dried for<br>DWTR, compared to<br>Al and Fe hydroxides                                             | Vegetable oil                                                                                      | Wastewater<br>from<br>refinery                      | 30 min                     | 5.0 - 11.0                                   | Batch tests showing the best removal of oil and grease, COD, and TSS at<br>acidic pH 6 and optimum dose of 1.1 g suspended solids by DWTR.<br>Comparable performance of coagulated Al and Fe salts. Improved<br>performance when adding FeCl <sub>3</sub> .                                                                                               | Basibuyuk and<br>Kalat, 2004 |
| Marrakech,<br>Morocco (Al)              | Oven-dried, crushed,<br>and sieved <2µm                                                                 | Olive oil                                                                                          | Mill<br>wastewater                                  | 30 min                     | 4.5 - 8.5                                    | Batch tests showing a removal rate of turbidity and COD varying from 59<br>to 93.5% and, from 49.4 to 68% depending on the nature of DWTR (wet<br>or dry).                                                                                                                                                                                                | Chahid et al., 2015          |
| Hong Kong, China<br>(Al)                | Oven-dried and<br>compared to freshly<br>precipitated alum                                              | 2 Dyes<br>Dianix Blue FBL-<br>E and Ciba-corn<br>Yellow P-6GS                                      | Synthetic<br>solutions                              | 30 min                     | 8.3 - 10.5                                   | Batch studies showing maximum adsorption of dyes at pH 9.13. The<br>back-diffusion of dye can be controlled by the addition of fresh alum.<br>Not recommended for the removal of hydrophilic dyes.                                                                                                                                                        | Chu, 2001                    |
| El-Beheira, Egypt<br>(Al)               | Dried and sieved to 2<br>mm (bulk) and 51µm,<br>which was ball milled<br>to <100 nm as<br>nanoparticles | Dye Indigo<br>Carmine (IC)                                                                         | Synthetic<br>solutions                              | 5 - 24 h<br>0 - 200<br>min | 2.0 - 11.0                                   | Batch tests showing nanoscale particles prepared from DWTR removing<br>90% of dye at the optimum pH of 5, being more effective than the larger<br>size of DWTR. The calculated Langmuir maximum adsorption capacity of<br>nano DWTR being 5.6 times higher than that of bulk DWTR.                                                                        | El-Kammah et al.,<br>2022b   |
| El-Beheira, Egypt<br>(Al)               | Dried and sieved to 2<br>mm (bulk) and 51µm,<br>which was ball milled<br>to <100 nm as<br>nanoparticles | Pesticide<br>Thiamethoxam<br>(TMX)                                                                 | Synthetic<br>solutions<br>and<br>wastewater         | 5 - 24 h<br>0 - 300<br>min | 2.0 - 11.0                                   | Nano-DWTR being efficient for TMX removal at optimum conditions at<br>pH 6–7, 100 mg of solid, and 180 min contact time. The process<br>following Langmuir isotherm at 2.6 times higher than that of bulk DWTR.<br>The remediation of TMX from wastewater of 77.9% and 70.3% for batch<br>and column treatment, respectively. Can be re-used in 3 cycles. | El-Kammah et al.,<br>2022c   |
| Asseiceira,<br>Portugal (Ca)            | Dried                                                                                                   | Olive oil                                                                                          | Olive oil<br>wastewater                             | 20 min<br>21 d<br>(BOD)    | 10.5 - 12.5                                  | Batch tests performed with 50 to 300 g/L DWTR, showing effective<br>removal of COD, BOD, total and suspended solids, phenols, total volatile<br>solids, oil and grease, and total phosphorus.                                                                                                                                                             | Fragoso and<br>Duarte, 2012  |
| Mumbai, India<br>(Al, Fe)               | Sun-dried, crushed,<br>and sieved <256 µm                                                               | Dye Disperse<br>Blue 79                                                                            | Synthetic<br>solutions                              | 10 min                     | 3.0 - 5.0                                    | Optimum color removal of 53% obtained at pH 3.0 with a DWTR dose of<br>30 g/L and dye concentration of 75 mg/L obtained experimentally in<br>batch test and predicted by the models.                                                                                                                                                                      | Gadekar and<br>Ahammed, 2019 |
| Hong Kong, China<br>(Al)                | Used as such added<br>to sewage raw water                                                               | SS<br>COD                                                                                          | Sewage<br>water                                     | 50 min                     | 6.5 - 6.9<br>(DWTR)<br>7.2 - 7.8<br>(Sewage) | Batch studies showing suspended solids (SS) and chemical oxygen<br>demand (COD) removal efficiencies improved by 20% and 15%,<br>respectively, mainly due to the removal of particles from 48 to 200 µm.<br>The appropriate dosage of DWTR determined to be 18–20 mg Al/L.                                                                                | Guan et al., 2005            |
| Dublin, Ireland<br>(Al)                 | Air dried                                                                                               | Total Nitrogen                                                                                     | Piggery<br>wastewater                               | 99 - 383 d                 | 7.2 - 7.6                                    | Tidal flow constructed wetland systems showing enhanced total N<br>removal under a high N loading rate. Improved N removal with<br>intermittent aeration of the system.                                                                                                                                                                                   | Hu et al., 2012a; b          |
| Thailand<br>(Al)                        | Addition of used<br>DWTR to test<br>laboratory systems<br>using fresh alum                              | Anionic<br>surfactants                                                                             | Wastewater<br>(talcum<br>powder and<br>surfactants) | 60 min                     | 2.0 - 12.0                                   | Batch tests showing the addition of DWTR and fresh alum at<br>concentrations of 400 and 600 mg/L, respectively, enhancing the<br>removal of TSS, turbidity, and TCOD to 76.2%, 99.5%, and 92.8%,<br>respectively, at pH 10.0.                                                                                                                             | Jangkorn et al.,<br>2011     |
| Go-san, South<br>Korea (Al)             | Mixed with charcoal<br>and bentonite in a<br>pellet                                                     | NH <sub>4</sub> <sup>+</sup> ions and<br>antibiotics<br>sulfathiazole<br>and sulfa-<br>methoxazole | Synthetic<br>solutions                              | 0 - 1560<br>min            | 7.5                                          | Batch and column studies showing pelletized adsorbent efficient to<br>remove 97% sulfathiazole and 72% sulfamethoxazole from solutions.<br>Also efficient in removing simultaneously 47 and 71% of ammonium and<br>phosphate, respectively. as reported in Table 2.                                                                                       | Jo et al., 2021b             |

|                          |                                                                       |                                                          |                               |             |                     |                                                                                                                                                                                                                                                                                                          |                                  |
|--------------------------|-----------------------------------------------------------------------|----------------------------------------------------------|-------------------------------|-------------|---------------------|----------------------------------------------------------------------------------------------------------------------------------------------------------------------------------------------------------------------------------------------------------------------------------------------------------|----------------------------------|
| Palapye, Botswana        | Oven-dried, ground, and sieved <1.18 mm                               | Saline water                                             | Real water                    | 5 - 840 min | 2.2 - 12.0          | Batch tests showing maximum removal efficiency of $\text{SO}_4^{2-}$ , $\text{Cl}^-$ , and $\text{NO}_3^-$ at 51.5, 22.6, and 100%, respectively, and for Na, Ni, and Mn ions at 100%, 100%, and 87.5%, respectively. Best described by the Freundlich model.                                            | Letshwenyo et al., 2023          |
| Aswan, Egypt (Al)        | Air-dried, crushed, sieved <0.2 mm, and pyrolyzed at high T           | Methylene blue (MB)                                      | Synthetic solutions           | 20 - 90 h   | 3.0 - 9.0           | Batch experiments showing the best removal of MB at 100 mg/L by a DWTR pyrolyzed at 700°C, at pH 7.0. Fitting the Langmuir isotherm model.                                                                                                                                                               | Rashed et al., 2016              |
| Tarn, France (Al)        | Air-dried, crushed, and sieved <250 $\mu\text{m}$                     | $\text{H}_2\text{S}$                                     | Synthetic gas mixture         | 0 - 700 h   | Starting at pH 10.0 | Fixed bed column studies showing the capacity of DWTR to adsorb $\text{H}_2\text{S}$ (374.2 mg/g) being higher than that of several reported adsorbents. Knudsen diffusion as the main mechanism.                                                                                                        | Ren et al., 2020                 |
| Hyderabad, India (Al)    | Dried and sieved to various sizes                                     | $\text{SO}_2$                                            | Gas                           | 0-60 min    | -                   | Using 100 mL of gas over 0.8 gram of DWTR at 250, 500, and 710 $\mu\text{m}$ particles and showing the fastest removal with smaller size.                                                                                                                                                                | Sirisha et al., 2012             |
| Koszalin, Poland (Fe)    | Dried and sieved at 45 to 250 $\mu\text{m}$                           | Dyes Ponceau 4R<br>Brilliant blue FCF<br>Malachite green | Synthetic solutions           | 0 - 24 h    | 3.5 - 9.5           | Batch studies showing dyes Ponceau 4R and brilliant blue FCF not being adsorbed on Fe-DWTR due to its negatively charged surface. Malachite adsorption described by the Freundlich model.                                                                                                                | Świdarska-Dąbrowska et al., 2018 |
| Suzhou, China, (Fe, Al)  | Air-dried, crushed, and sieved. acid-alkali and ultrasonic treatments | Ammonium                                                 | Synthetic solutions           | 24 h        | 4.0 - 10.0          | Batch tests showing non-modified DWTR not being an effective adsorbent for ammonium. The treatment involving acid and alkali ultrasonic modifications showing 80-90% removal of $\text{NH}_4^+$ at pH 7-8 and a maximum capacity evaluated by Langmuir isotherm to 5.1 to 6.1 mg/g.                      | Yang et al., 2015                |
| Putrajaya, Malaysia (Al) | Air-dried, crushed, and sieved 250 -500 $\mu\text{m}$                 | Carbon dioxide                                           | Gas mixture                   | 0 - 40 min  | Not given           | Column studies showing adsorption being dependent on temperature with a maximum reported capacity of 32.56 mg/g. Isotherm being well-fitted with the Freundlich.                                                                                                                                         | Yusuff et al., 2017; 2018        |
| Beijing, China (Fe, Al)  | Dried                                                                 | Herbicide Atrazine (ATZ) (degradation)                   | Synthetic solutions           | 0 - 6 h     | 3.0, 5.0, 7.0       | Batch tests showing DWTR being used as a catalyst for the activation of peroxymonosulfate (PMS) to remove ATZ and leading to more than 92% ATZ being removed. ATZ degradation being positively affected by higher PMS concentration, DWTR dosage and temperature, and low pH.                            | Zhang et al., 2018               |
| Beijing, China (Fe, Al)  | Air-dried, crushed, and sieved <0.15 mm                               | Pesticide Chlorpyrifos                                   | Synthetic solutions and soils | 0 - 72 h    | 4.10 - 7.21         | Batch studies showing rapid followed by slower adsorption of pesticide at environmental pH 4-7. Inhibition at high ionic strength and in the presence of low molecular weight organic acids. Described by the pseudo-second-order model and Freundlich equation. Greater affinity for DWTR than to soil. | Zhao et al., 2013                |
| Beijing, China (Fe, Al)  | Air-dried, crushed, sieved <0.15 mm                                   | Herbicide Glyphosate                                     | Synthetic solutions and soils | 0 - 36 h    | 4.0 - 10.0          | Batch experiments showing significant enhancement of glyphosate removal for soils amended with DWTR and better retention at all tested pH.                                                                                                                                                               | Zhao et al., 2015                |
| Beijing, China (Fe)      | Dried and ultrasonicated, washed before coagulation                   | Dissolved organic carbon                                 | Raw water                     | -           | 8.2 (raw water)     | Recycling sonicated, washed DWTS could enhance the removal of hydrophobic acids and effectively remove matter of molecular weight 3–30 kDa, but increased the relative presence of matter with a molecular weight <3 kDa.                                                                                | Zhou et al., 2018                |

Table S5. Utilizations of DWTR in construction materials and environmental applications

| Treatments / Modifications                                                                                                                                                     | Applications                                                                     | References                                                                                                                                                                                                                                                                                                                                                                                                                                                                                                                                                                                                                                                                                                                                                                            |
|--------------------------------------------------------------------------------------------------------------------------------------------------------------------------------|----------------------------------------------------------------------------------|---------------------------------------------------------------------------------------------------------------------------------------------------------------------------------------------------------------------------------------------------------------------------------------------------------------------------------------------------------------------------------------------------------------------------------------------------------------------------------------------------------------------------------------------------------------------------------------------------------------------------------------------------------------------------------------------------------------------------------------------------------------------------------------|
| DWTR is dried and crushed, (sometimes calcined or alkalinized), added in various proportions to cement or other waste materials (e.g. ash, biosorbents) and cured or fired up. | Concrete or Cement or Cementitious composites or Mortar or Aggregates or Clinker | Ahmed et al., 2022; Altherman et al., 2023; Bohórquez González et al., 2020; Breesem et al., 2016; Chen et al., 2010; Ching et al., 2021; Dahhou et al., 2018; de Godoy et al., 2019; 2020; de Oliveira Andrade et al., 2018; El-Didamony et al., 2014; Fang et al., 2019; Frías et al., 2014; Gastaldini et al., 2015; Gomes et al., 2020; 2022; Hagemann et al., 2019; He et al., 2023; Hemkemeier et al., 2023; Huang et al., 2013; Jia et al., 2021; Kaish et al., 2018; 2021; Li et al., 2021; Liu et al., 2021b; 2022a; b; Ng et al., 2022; Owaied et al., 2014; 2019; Pham et al., 2021; Rodríguez et al., 2010; 2011; Ruviaro et al., 2021; Sales et al., 2011; Shamaki et al., 2021; Tantawy, 2015; Wang et al., 2018d; Xu et al., 2014; Yang et al., 2023; Yen et al., 2011 |
| DWTR being dried, crushed, (sometimes calcined), mixed with clay or other materials (e.g. ash, biosorbents) in various proportions, and cured or fired up                      | Bricks or Paving blocks or Building Materials                                    | Ahmadi et al., 2023; Benlalla et al., 2015; Chiang et al., 2009; Hassan et al., 2014; Huang et al., 2001; Lin et al., 2006; Liu et al., 2020a; b; c; 2021a; Rahman et al., 2019; Ramadan et al., 2008; Sajath et al., 2022; Tantawy and Mohamed, 2017; Zhao et al., 2016                                                                                                                                                                                                                                                                                                                                                                                                                                                                                                              |
| DWTR being dried, (sometimes calcined), added to clay and other compounds in various proportions, and fired up                                                                 | Ceramics or Tiles or Ceramsite                                                   | Cremades et al., 2018; Kizinievič et al., 2013; Huang et al., 2023; Ling et al., 2017; Monteiro et al., 2008; Teixeira et al., 2011; Teoh et al., 2022; Wolff et al., 2015; Zamora et al., 2008                                                                                                                                                                                                                                                                                                                                                                                                                                                                                                                                                                                       |
| DWTR is dewatered and mixed with other compounds such as sand to produce geomaterials or alkalis and biosorbents or slag to produce geopolymers that could be added to cement  | Geopolymers or Geomaterials or Geotechnical applications                         | Balkaya, 2015; Flemmy et al., 2022; Geraldo et al., 2017; Ji et al., 2020; Nimwinya et al., 2016; Waijarean et al., 2014                                                                                                                                                                                                                                                                                                                                                                                                                                                                                                                                                                                                                                                              |
| DWTR dried and crushed, fusion in NaOH, and hydrothermal treatment                                                                                                             | Zeolites                                                                         | Espejel-Ayala et al., 2013                                                                                                                                                                                                                                                                                                                                                                                                                                                                                                                                                                                                                                                                                                                                                            |
| DWTR added to soils or wetlands as a sorbent or to improve soil properties and in road construction                                                                            | Soils and Wetlands or Geo-environmental applications                             | Bağrıaçık and Güner, 2020; Caniani et al., 2013; Fiore et al., 2022; Nguyen et al., 2023                                                                                                                                                                                                                                                                                                                                                                                                                                                                                                                                                                                                                                                                                              |

## Supplementary References

- Abo-El-Enein, S.A., Shebl, A., Abo-El-Dahab, S.A. (2017) Drinking water treatment sludge as an efficient adsorbent for heavy metals removal. *Applied Clay Science*, 146, 343-349. dx.doi.org/10.1016/j.clay.2017.06.027
- Agin-Birikorang, S., O'Connor, G.A., Jacobs, L.W., Makris, K.C., Brinton, S.R. (2007) Long-term phosphorus immobilization by a drinking water treatment residuals. *Journal of Environmental Quality*, 36, 313-323. doi: 10.2134/jeq2006.0162
- Ahmadi, M., Hakimi, B., Mazaheri, A., Kioumars, M. (2023) Potential use of water treatment sludge as partial replacement for clay in eco-friendly fired clay bricks. *Sustainability*, 15, 9389. doi.org/10.3390/su15129389
- Ahmed, F.R., Muhammad, M.A., Ibrahim, R.K. (2022) Effect of alum sludge on concrete strength and two-way shear capacity of flat slabs. *Structures*, 40, 991-1001. doi.org/10.1016/j.istruc.2022.04.086
- Ahmad, T., Ahmad, K., Alam, M. (2021) Simultaneous modelling of coagulant recovery and reuse by response surface methodology. *Journal of Environmental Management*, 285, 112139. doi.org/10.1016/j.jenvman.2021.112139
- Al-Tahmazi, T., Babatunde, A.O. (2016) Mechanistic study of P retention by dewatered waterworks sludges. *Environmental Technology and Innovation*, 6, 38-48. dx.doi.org/10.1016/j.eti.2016.05.002
- Altheman, D., Gachet, L.A., Pires, M.S., Lintz, R.C.C. (in press) Water treatment waste as supplementary cementitious material. *Materials Today: Proceedings*, xx, doi.org/10.1016/j.matpr.2023.04.418
- Awab, H., Paramalinggam, T. (2011) Mussel shell and waterworks sludge as sorbent materials for the removal of Cu(II) from aqueous solutions. *Journal of Fundamental Sciences*, 7, 113-119. dx.doi.org/10.11113/mjfas.v7n2.248
- Babatunde, A.O., Zhao, Y.Q. (2007) Constructive approaches toward water treatment works sludge management: An international review of beneficial reuses. *Critical Reviews of Environmental Science and Technology*, 37, 129-164. doi: 10.1080/10643380600776239
- Babatunde, A.O., Zhao, Y.Q., Yang, Y., Kearney, P. (2008) Reuse of dewatered aluminium-coagulated water treatment residual to immobilize phosphorus: Batch and column trials using a condensed phosphate. *Chemical Engineering Journal*, 136, 108-115. doi: 10.1016/j.cej.2007.03.013
- Babatunde, A.O., Zhao, Y.Q., Burke, A.M., Morris, M.A., Hanrahan, J.P. (2009) Characterization of aluminium-based water treatment residual for potential phosphorus removal in engineered wetlands. *Environmental Pollution*, 157, 2830-2836. doi: 10.1036/j.envpol.2009.04.016
- Bağrıaçık, B., Güner, E.D. (2020) An experimental investigation of reinforcement thickness of improved clay soil with drinking water treatment sludge as an additive. *KSCE Journal of Civil Engineering*, 24, 3619-3627. doi: 10.1007/s12205-020-0111-5
- Bai, L., Wang, C., Pei, Y., Zhao, J. (2014a) Reuse of drinking water treatment residuals in a continuous stirred tank reactor for phosphate removal from urban wastewater. *Environmental Technology*, 35, 2752-2759. dx.doi.org/10.1080/09593330.2014.920050
- Bai, L., Wang, C., Huang, C., He, L., Pei, Y. (2014b) Reuse of drinking water treatment residuals as a substrate in constructed wetlands for sewage tertiary treatment. *Ecological Engineering*, 70, 295-303. dx.doi.org/10.1016/j.ecoleng.2014.06.015
- Bayley, R.M., Ippolito, J.A., Stromberger, M.E., Barbarick, K.A., Paschke, M.W. (2008) Water treatment residuals and biosolids co-applications affect semiarid rangeland phosphorus cycling. *Soil Science Society of America Journal*, 72, 711-719. doi: 10.2136/sssaj2007.0109
- Balkaya, M. (2015) Evaluation of the geotechnical properties of alum sludge, zeolite, and their mixtures for beneficial usage. *Environmental Progress and Sustainable Energy*, 34, 1028-1037. doi 10.1002/ep
- Benlalla, A., Elmoussaouiti, M., Dahhou, M., Assafi, M. (2015) Utilization of water treatment plant sludge in structural ceramic blocks. *Applied Clay Science*, 118, 171-177. dx.doi.org/10.1016/j.clay.2015.09.012

- Bhatnagar, A., Sillanpää, M., Witek-Krowiak, A. (2015) Agricultural peels as versatile biomass for water purification – A review. *Chemical Engineering Journal*, 270, 244-271. dx.doi.org/10.1016/j.cej.2015.01.135
- Bohórquez González, K., Pacheco, E., Guzmán, A., Pereira, Y.A., Cuadro, H.C., Valencia, J.A.F. (2020) Use of sludge ash from drinking water treatment plant in hydraulic mortars. *Materials Today Communication*, 23, 100930. doi.org/10.1016/j.mtcomm.2020.100930
- Breesem, K.M., Abood, M.M., Rahman, N.A. (2016) Influence of magnesium sulfate on self-compacting alum sludge concrete incorporating with pozzolanic materials. *Modern Applied Science*, 10. Canadian Center of Science and Education. ISSN 1913-1844
- Boyer, T.H., Persaud, A., Banerjee, P., Palomino, P. (2011) Comparison of low-cost and engineered materials for phosphorus removal from organic-rich surface water. *Water Research*, 45, 4803-4814. doi: 10.1016/j.watres.2011.06.020
- Callery, O., Healy, M.G., Rognard, F., Barthelemy, L., Brennan, R.B. (2016) Evaluating the long-term performance of low-cost adsorbents using small-scale adsorption column experiments. *Water Research*, 101, 420-440. dx.doi.org/10.1016/j.watres.2016.05.093
- Caniani, D., Masi, S., Mancini, I.M., Truli, E. (2013) Innovative reuse of drinking water sludge in geo-environmental applications. *Waste Management*, 33, 1461-1468. dx.doi.org/10.1016/j.wasman.2013.02.007
- Carleton, G., Cutright, T.J. (2020) Evaluation of alum-based water treatment residuals used to adsorb reactive phosphorus. *Water Science and Engineering*, 13, 181-192. doi.org/10.1016/j.wse.2020.09.008
- Chen, H., Ma, X., Dai, H. (2010) Reuse of water purification sludge as raw material in cement production. *Cement and Concrete Composites*, 32, 436-439. doi: 10.1016/j.cemconcomp.2010.02.009
- Chiang, K.-Y., Chou, P.-H., Hua, C.-R., Chien, K.-L., Cheeseman, C. (2009) Lightweight bricks manufactured from water treatment sludge and rice husks. *Journal of Hazardous Materials*, 171, 76-82. doi: 10.1016/j.jhazmat.2009.05.144
- Chiang, Y.W., Ghyselbrecht, K., Santos, R.M., Martens, J.A., Swennen, R., Cappuyns, V., Meesschaert, B. (2012) Adsorption of multi-heavy metals onto water treatment residuals: Sorption capacities and applications. *Chemical Engineering Journal*, 200-202, 405-415. dx.doi.org/10.1016/j.cej.2012.06.070
- Ching, C.Y., Bashir, M.J.K., Aun, N.C., Aldahdooh, M.A.A. (2021) Sustainable production of concrete with treated alum sludge. *Construction and Building Materials*, 282, 122703. doi.org/10.1016/j.conbuildmat.2021.122703
- Chittoo, B.S., Sutherland, C. (2014) Adsorption of phosphorus using water treatment sludge. *Journal of Applied Sciences*, 14, 3455-3463. doi: 10.3923/jas.2014.3455.3463
- Choi, S.B., Yun, Y.-S. (2006) Biosorption of cadmium by various types of dried sludge: An equilibrium study and investigation of mechanisms. *Journal of Hazardous Materials*, B138, 378-383. doi: 10.1016/j.jhazmat.2006.05.059
- Cremades, L.V., Cusidó, J.A., Arteaga, F. (2018) Recycling of sludge from drinking water treatment as ceramic material for the manufacture of tiles. *Journal of Cleaner Production*, 201, 1071-1080. doi.org/10.1016/j.jclepro.2018.08.094
- Chu, W. (1999) Lead metal removal by recycled alum sludge. *Water Research*, 33, 3019-3025. PII: S0043-1354(99)00010-X
- Chu, W. (2001) Dye removal from textile dye wastewater using recycled alum sludge. *Water Research*, 35, 3147-3152. PII: S0043-1354(01)00015-X
- Dahhou, M., El Moussaouiti, M., Arshad, M.A., Moustahsine, S., Assafi, M. (2018) Synthesis and characterization of drinking water treatment plant sludge-incorporated Portland cement. *Journal of Material Cycles and Waste Management*, 20, 891-901. doi.org/10.1007/s10163-017-0650-0
- Dayton, E.A., Basta, N.T. (2001) Characterization of drinking water treatment residuals for use as a soil substitute. *Water Environment Research*, 73, 52-57. doi/10.2175/106143001X138688

- Dayton, E.A., Basta, N.T., Jakober, C.A., Hattey, J.A. (2003) Using treatment residuals to reduce phosphorus in agricultural runoff. *Journal of the American Water Works Association (AWWA)*, 95, 151-158. doi/10.1002/j.1551-8833.2003.tb10341.x
- Deliz Quiñones, K., Hovsepyan, A., Oppong-Anane, A., Bozongo, J.-C.J. (2016) Insights into the mechanisms of mercury sorption onto aluminum based drinking water treatment residuals. *Journal of Hazardous Materials*, 307, 184-192. dx.doi.org/10.1016/j.jhazmat.2016.01.001
- de Godoy, L.G.G., Rohden, A.B., Garcez, M.R., da Costa, E.B., Da Dalt, S., de Oliveira Andrade, J.J. (2019) Valorization of water treatment sludge waste by application as supplementary cementitious material. *Construction and Building Materials*, 223, 939-950. doi.org/10.1016/j.conbuildmat.2019.07.333
- de Godoy, L.G.G., Rohden, A.B., Garcez, M.R., Da Dalt, S., Gomes L.B (2020) Production of supplementary cementitious as a sustainable management for water treatment sludge waste. *Case Studies in Construction Materials*, 12, e00329. doi.org/10.1016/j.cscm.2020.e00329
- de Oliveira Andrade, J.J., Wenzel, M.C., da Rocha, G.H., da Silva, S.R. (2018) Performance of rendering mortars containing sludge from water treatment plants as fine recycled aggregate. *Journal of Cleaner Production*, 192, 159-168. doi.org/10.1016/j.jclepro.2018.04.246
- El-Didamony, H., Khalil, Kh.A., Heikal, M. (2014) Physico-chemical and surface characteristics of some granulated slag-fired drinking water sludge composite cement pastes. *HBRC Journal*, 10, 73-81. dx.doi.org/10.1016/j.hbrj.2013.09.004
- El-Kammah, M., Elkhatib, E., Gouveia, S., Cameselle, C., Aboukila, E. (2022b) Cost-effective ecofriendly nanoparticles for rapid and efficient indigo carmine dye removal from wastewater: Adsorption equilibrium, kinetics and mechanism. *Environmental Technology and Innovation*, 28, 102595. doi.org/10.1016/j.eti.2022.102595
- El-Kammah, M., Elkhatib, E., Gouveia, S., Cameselle, C., Aboukila, E. (2022c) Enhanced removal of Thiamethoxam from wastewater using waste-derived nanoparticles: Adsorption performance and mechanisms. *Environmental Technology and Innovation*, 28, 102713. doi.org/10.1016/j.eti.2022.102713
- Elliott, H.A., O'Connor, G.A., Lu, P., Brinton, S. (2002) Influence of water treatment residuals on phosphorus solubility and leaching. *Journal of Environmental Quality*, 31, 1362-1369. doi: 10.2134/jeq2002.1362
- Elliott, H.A., Dempsey, B.A. (1991) Agronomic effects of land application of water treatment sludges, *Journal of the American Water Works Association (AWWA)*, 83, 126-131.
- Espejel-Ayala, F., Schouwenaars, R., Durán-Moreno, A., Ramírez-Zamora, R.M. (2013) Use of drinking water sludge in the production process of zeolites. *Research on Chemical Intermediates*, 10 pp. doi: 10.1007/s11164-013-1138-8
- Everaert, M., Bergmans, J., Broos, K., Hermans, B., Michielson, B. (2021) Granulation and calcination of alum sludge for the development of a phosphorus adsorbent: From lab scale to pilot scale. *Journal of Environmental Management*, 279, 111525. doi.org/10.1016/j.jenvman.2020.111525
- Fang, X., Wang, L., Poon, C.S., Baek, K., Tsang, D.C.W., Kwok, S.K. (2019) Transforming waterworks sludge into controlled low-strength material: Bench-scale optimization and field test validation. *Journal of Environmental Management*, 232, 254-263. doi.org/10.1016/j.jenvman.2018.11.091
- Fiore, F.A., Rodgher, S., Ito, C.Y.K., dos Saatos Bardini, V.S., Klinsky, L.M.G. (2022) Water sludge reuse as a geotechnical component in road construction: Experimental study. *Cleaner Engineering and Technology*, 9, 100512. doi.org/10.1016/j.clet.2022.100512
- Flemmy, S.O., Omine, K., Zhang, Z. (2022) Simple dehydration technique using drainage string to treat drinking water sludge for utilization as geomaterial. *Journal of Material Cycles and Waste Management*, 24, 1355-1367. doi.org/10.1007/s10163-022-01420-x
- Fouad, M.M., Razek, T.M.A., Elgendy, A.S. (2017) Utilization of drinking water treatment sludge to produce aluminum sulfate coagulant. *Water Environment Research*, 89, 186-191. doi: 10.2175/106143016X14504669769056

- Frías, M., de la Villa, R.V., de Soto, I., García, R., Baloa, T.A. (2014) Influence of activated drinking-water treatment waste on binary cement-based composite behavior: Characterization and properties. *Composites: Part B*, 60, 14-20. dx.doi.org/10.1016/j.compositesb.2013.12.020
- Gadekar, M.R., Ahammed, M.M. (2019) Modelling dye removal by adsorption onto water treatment residuals using combined response surface methodology-artificial neural network approach. *Journal of Environmental Management*, 231, 241-248. doi.org/10.1016/j.jenvman.2018.10.017
- Gallimore, L.E., Basta, N.T., Storm, D.E., Payton, M.E., Huhnke, R.H., Smolen, M.D. (1999) Water treatment residual to reduce nutrients in surface runoff from agricultural land. *Journal of Environmental Quality*, 28, 1474-1478. doi: 10.2134/jeq1999.00472425002800050012x
- Gao, S., Wang, C., Pei, Y. (2013) Comparison of different phosphate species adsorption by ferric and alum water treatment residuals. *Journal of Environmental Sciences*, 25, 996-992. doi: 10.1016/s1001-0742(12)60113-2
- Gastaldini, A.L.G., Hengen, M.F., Gastaldini, M.C.C., do Amaral, F.D., Antolini, M.B., Coletto, T. (2015) The use of water treatment plant sludge ash as a mineral addition. *Construction and Building Materials*, 94, 513-520. dx.doi.org/10.1016/j.conbuildmat.2015.07.038
- Georgantas, D.A., Grigoropoulou, H.P. (2005) Phosphorus removal from synthetic and municipal wastewater using spent sludge. *Water Science and Technology*, 52, 525-532. doi.org/10.2166/wst.2005.0732
- Georgantas, D.A., Matsis, V.M., Grigoropoulou, H.P. (2006) Soluble phosphorus removal through adsorption on spent alum sludge. *Environmental Technology*, 27, 1081-1088. doi.org/10.1080/09593332708618726
- Geraldo, R.H., Fernandez, L.F.R., Camarini, G. (2017) Water treatment sludge and rice husk ash to sustainable geopolymer production. *Journal of Cleaner Production*, 149, 146-155. dx.doi.org/10.1016/j.jclepro.2017.02.076
- Ghorpade, A., Ahammed, M.M. (2018) Water treatment sludge for removal of heavy metals from electroplating wastewater. *Environmental Engineering Research*, 23, 92-98. doi.org/10.4491/eer.2017.065
- Gibbons, M.K., Mortula, M.M., Gagnon, G.A. (2009) Phosphorus adsorption on water treatment residual solids. *Journal of Water Supply Research and Technology*, 58, 1-10. doi: 10.2166/aqua.2009.017
- Gibbons, M.K., Gagnon, G.A. (2010) Adsorption of arsenic from a Nova Scotia groundwater onto water treatment residual solids. *Water Research*, 44, 5740-5749. doi: 10.1016/j.watres.2010.06.050
- Gibbons, M.K., Gagnon, G.A. (2011) Understanding removal of phosphate or arsenate onto water treatment residual solids. *Journal of Hazardous Materials*, 186, 1916-1923. doi: 10.1016/j.jhazmat.2010.12.085
- Gomes, S.D.C., Zhou, J.L, Li, W., Long, G. (2019) Progress in manufacture and properties of construction materials incorporating water treatment sludge: A review. *Resources, Conservation and Recycling*, 145, 148-159. doi.org/10.1016/j.resconrec.2019.02.032
- Gomes, S.D.C., Zhou, J.L., Li, W., Qu, F. (2020) Recycling of raw water treatment sludge in cementitious composites: effects of heat evolution, compressive strength and microstructure. *Resources, Conservation and Recycling*, 161, 104970. doi.org/10.1016/j.resconrec.2020.104970
- Gomes, S.D.C., Zhou, J.L., Zeng, X., Long, G. (2022) Water treatment sludge conversion to biochar as cementitious material in cement composite. *Journal of Environmental Management*, 306, 114463. doi.org/10.1016/j.jenvman.2022.114463
- Guan, X.-H., Chen, G.-H., Shang, C. (2005) Re-use of water treatment works sludge to enhance particulate pollutant removal from sewage. *Water Research*, 39, 343-3440. doi: 10.1016/j.watres.2004.07.033
- Gupta, V.K., Carrott, P.J.M., Ribeiro Carrott, M.M.L., Suhas (2009) Low-cost adsorbents: Growing approach to wastewater treatment – a Review. *Critical Reviews in Environmental Science and Technology*, 39, 783-842. doi: 10.1080/10643380801977610
- Hagemann, S.E., Gastaldini, A.L.G., Cocco, M., Jahn, S.L., Terra, L.M. (2019) Synergic effect of the substitution of Portland cement for water treatment plant sludge ash and ground limestone: Technical and economic evaluation. *Journal of Cleaner Production*, 214, 916-926. doi.org/10.1016/j.jclepro.2018.12.324



- Hassan, K.M., Fukushi, K., Turikuzzaman, K., Moniruzzaman, S.M. (2014) Effects of using arsenic-iron wastes in brick making. *Waste Management*, 34, 1072-1078. dx.doi.org/10.1016/j.wasman.2013.09.022
- He, Z.-H., Xu, H., Han, X.-D., Huynh, T.-P., Aslani, F., Shi, J.-Y. (2023) Utilization of manganese-rich sludge in concrete: Mechanical, nanoscale characteristics and leaching behavior. *Journal of Building Engineering*, 70, 106359. doi.org/10.1016/j.jobbe.2023.106359
- Hemkemeier, T.A., Almeida, F.C.R., Sales, A., Klemm, A.J. (2023) Repair mortars with water treatment plant sludge (WTPS) and sugarcane bagasse ash sand (SBAS) for more eco-efficient and durable constructions. *Journal of Cleaner Production*, 386, 135750. doi.org/10.1016/j.jclepro.2022.135750
- Hokkanen, S., Bhatnagar, A., Sillanpää, M. (2016) A review on modification methods to cellulose-based adsorbents to improve adsorption capacity. *Water Research*, 91, 156-173. dx.doi.org/10.1016/j.watres.2016.01.008
- Huang, C., Pan, J.R., Sun, K.-D., Liaw, C.-T. (2001) Reuse of water treatment plant sludge and dam sediment in brick-making. *Water Science and Technology*, 42, 273-277. doi.org/10.2166/wst.2001.0639
- Hou, Q., Meng, P., Pei, H., Hu, W., Chen Y. (2018) Phosphorus adsorption characteristics of alum sludge: Adsorption capacity and the forms of phosphorus retained in alum sludge. *Materials Letters*, 229, 31-35. doi.org/10.1016/j.matlet.2018.06.102
- Hu, Y.S., Zhao, Y.Q., Zhao, X.H., Kumar, J.L.G. (2012a) Comprehensive analysis of step-feeding strategy to enhance biological nitrogen removal in alum sludge-based tidal flow constructed wetlands. *Bioresource Technology*, 111, 27-35. doi: 10.1016/j.biortech.2012.01.165
- Hu, Y.S., Zhao, Y.Q., Zhao, X.H., Kumar, J.L.G. (2012b) High rate nitrogen removal in alum sludge-based intermittent aeration constructed wetlands. *Environmental Science and Technology*, 46, 4583-4590. dx.doi.org/10.1026/es204105h
- Hua, T., Haynes, R.J., Zhou, Y.-F., Boulemant, A., Chandrawana, I. (2015) Potential use of industrial waste materials as filter media for removal of Al, Mo, As, V and Ga from alkaline drainage in constructed wetlands – Adsorption studies. *Water Research*, 71, 32-41. dx.doi.org/10.1016/j.watres.2014.12.036
- Huang, S.-H., Chiswell, B. (2000) Phosphate removal from wastewater using spent alum sludge. *Water Science and Technology*, 42, 295-300. doi.org/10.2166/wst.2000.0394
- Huang, C., Pan, J.R., Liu, Y. (2005) Mixing water treatment residual with excavation waste soil in brick and artificial aggregate making. *Journal of Environmental Engineering*, 131, 272-277. doi.org/10.1061/(ASCE)0733-9372(2005)131:2(272)
- Huang, C.-H., Wang, S.-Y. (2013) Application of water treatment sludge in the manufacturing of lightweight aggregate. *Construction and Building Materials*, 43, 174–183. dx.doi.org/10.1016/j.conbuildmat.2013.02.016
- Huang, C., Yuan, N., He, X., Wang, C. (2023) Ceramsite made from drinking water treatment residue for water treatment: A critical review in association with typical ceramsite making. *Journal of Environmental Management*, 328, 117000. doi.org/10.1016/j.jenvman.2022.117000
- Ippolito, J.A., Barbarick, K.A. (2006) Phosphorus extraction methods for water treatment residuals – Amended soils. *Communications in Soil Science and Plant Analysis*, 37, 859-870. doi: 10.1080/000103620600564190
- Ippolito, J.A., Barbarick, K.A., Heil, D.M., Chandler, J.P., Redente, E.F. (2003) Phosphorus retention mechanisms of a water treatment residual. *Journal of Environmental Quality*, 32, 1857-1864. doi: 10.2134/jeq2010.0242
- Ippolito, J.A., Scheckel, K.G., Barbarick, K.A. (2009) Selenium adsorption to aluminum-based water treatment residuals. *Journal of Colloid and Interface Science*, 338, 48-55. doi: 10.1016/j.jcis.2009.06.023
- Irawan, C., Liu, J.C., Wu, C.-C. (2011) Removal of boron using aluminum-based water treatment residuals (Al-WTRs). *Desalination*, 276, 322-327. doi: 10.1016/j.desal.2011.03.070

- Jangkorn, S., Kuhakaew, S., Theantanoo, S., Krinla-or, H., Sriwiriyarat, T. (2011) Evaluation of reusing alum sludge for the coagulation of industrial wastewater containing mixed anionic surfactants. *Journal of Environmental Sciences*, 23, 587-594. doi: 10.1016/s1001-0742(10)60451-2
- Ji, Z., Pei, Y. (2020) Immobilization efficiency and mechanism of metal cations ( $\text{Cd}^{2+}$ ,  $\text{Pb}^{2+}$  and  $\text{Zn}^{2+}$ ) and anions ( $\text{AsO}_4^{3-}$  and  $\text{Cr}_2\text{O}_7^{2-}$ ) in wastes-based geopolymer. *Journal of Hazardous Materials*, 384, 121290. doi.org/10.1016/j.jhazmat.2019.121290
- Jia, Q., Lu, J., Yang, J. (2021) Investigation on the feasibility of resource utilizing drinking water treatment sludge as a pozzolan to prepare cement-based materials. *E3S Web of Conferences*, 267, 02006. doi.org/10.1051/e3sconf/202126702006
- Jung, K.-W., Hwang, M.-J., Kim, K., Ahn, K.-H. (2016b) Adsorption of phosphate from aqueous solution onto pyrolyzed drinking water treatment residuals: Statistical process optimization, equilibrium, and kinetic analysis. *Energy Progress and Sustainable Energy*, 35, 1035-1046. doi: 10.1002/ep
- Jung, K.-W., Hwang, M.-J., Park, D.S, Ahn, K.-H. (2016c) Comprehensive reuse of drinking water treatment residuals in coagulation and adsorption processes. *Journal of Environmental Management*, 181, 425-434. dx.doi.org/10.1016/j.jenvman.2016.06.041
- Kaggwa, R.C., Mulalelo, C.I., Denny, P., Okurut, T.O. (2001) The impact of alum discharge on a natural tropical wetland in Uganda. *Water Research*, 35, 795-807. PII: S0043-1354(00)00301-8
- Kaish, A.B.M.A., Breesem, K.M., Abood, M.M. (2018) Influence of pre-treated alum sludge on properties of high-strength self-compacting concrete. *Journal of Cleaner Production*, 302, 1085-1096. doi.org/10.1016/j.jclepro.2018.08.156
- Kaish, A.B.M.A., Odimegwu, T.C., Zakaria, I., Abood, M.M., Nahar, L. (2021) Properties of concrete incorporating alum sludge in different conditions as partial replacement of fine aggregate. *Construction and Building Materials*, 284, 122669. doi.org/10.1016/j.conbuildmat.2021.122669
- Kang, S., Choi, J.-H, Park, J.-G., Baek, K. (2019b) Pellet adsorbent derived from molasses and dewatered alum sludge for arsenic removal. *Journal of CO<sub>2</sub> Utilization*, 33, 31-36. doi.org/10.1016/j.cou.2019.05.002
- Kim, J.G., Kim, J.H., Moon, H.-S., Chon, C.-M., Ahn, J.S. (2003) Removal capacity of water plant alum sludge for phosphorus in aqueous solutions. *Chemical Speciation and Bioavailability*, 14, 67-73. doi: 10.3184/095422902782775344
- Kizinievič, O., Žurauskienė, R., Kizinievič, V., Žurauskas, R. (2013) Utilisation of sludge waste from water treatment for ceramic products. *Construction and Building Materials*, 41, 464-473. dx.doi.org/10.1016/j.conbuildmat.2012.12.041
- Leader, J.W., Reddy, K.R., Wilkie, A.C. (2005) Optimization of low-cost phosphorus removal from wastewater using co-treatments with constructed wetlands. *Water Science and Technology*, 51, 283-290. doi.org/10.2166/wst.2005.0338
- Lee, L.Y., Wang, B., Guo, H., Hu, J.Y., Ong, S.L. (2015) Aluminum-based water treatment residue reuse for phosphorus removal. *Water*, 7, 1480-1496. doi: 10.3390/w7041480
- Li, X., Cui, J., Pei, Y. (2018) Granulation of drinking water treatment residuals as applicable media for phosphorus removal. *Journal of Environmental Management*, 213, 36-46. doi.org/10.1016/j.jenvman.2018.02.056
- Li, D., Zhuge, Y., Liu, Y., Pham, P.N., Zhang, C., Duan, W., Ma, X. (2021) Reuse of drinking water treatment sludge in mortar as substitutions of both fly ash and sand based on two treatment methods. *Construction and Building Materials*, 277, 122330. doi.org/10.10156/j.conbuildmat.2021.122330
- Lian, J.-J., Yang, M., Chen, B., Wang, S.-S., Ye, T.-R., Zheng, D.-D., Jiang, C.R. (2019) Characteristics and mechanisms of molybdenum(VI) adsorption by drinking water treatment residue. *Desalination and Water Treatment*, 142, 235-243. doi: 10.5004/dwt.2019.23408

- Lian, J.-J., Zhou, F., Chen, B., Yang, M., Wang, S.-S., Liu, Z., Niu, S. (2020) Enhanced adsorption of molybdenum(VI) onto drinking treatment residues modified by thermal treatment and acid activation. *Journal of Cleaner Production*, 244, 118719. doi.org/10.1016/j.jclepro.2019.118719
- Lin, L., Xu, X., Papelis, C., Cath, T.Y., Xu, P. (2014) Sorption of metals and metalloids from reverse osmosis concentrate on drinking water treatment solids. *Separation and Purification Technology*, 134, 37-45. dx.doi.org/10.1016/j.seppur.2014.07.008
- Lin, C.-F., Wu, C.-H., Ho, H.-M. (2006) Recovery of municipal waste incineration bottom ash and water treatment sludge to water permeable pavement materials. *Waste Management*, 26, 970-978. doi: 10.1016/j.wasman.2005.09.014
- Ling, Y.P., Tham, R.-H., Lim, S.-M., Fahim, M., Ooi, C.-H., Krishnan, P., Matsumoto, A., Yeoh, F.-Y. (2017) Evaluation and reutilization of water sludge from fresh water processing plant as a green clay substituent. *Applied Clay Science*, 143, 300-306. dx.doi.org/10.1016/j.clay.2017.04.007
- Liu, R., Zhao, Y., Sibille, C., Ren, B. (2016) Evaluation of natural organic water release from alum sludge in wastewater treatment and its role in P adsorption. *Chemical Engineering Journal*, 302, 120-127. dx.doi.org/10.1016/j.cej.2016.05.019
- Liu, Y., Zhuge, Y., Chow, C.W.K., Keegan, A., Li, D., Pham, P.N., Huang, J., Siddique, R. (2020a) Utilization of drinking water treatment sludge in concrete paving blocks: Microstructural analysis, durability and leaching properties. *Journal of Environmental Management*, 262, 110352. doi.org/10.1016/j.jenvman.2020.110352
- Liu, Y., Zhuge, Y., Chow, C.W.K., Keegan, A., Li, D., Pham, P.N., Huang, J., Siddique, R. (2020b) Properties and microstructure of concrete blocks incorporating drinking water treatment sludge exposed to early-age carbonation curing. *Journal of Cleaner Production*, 261, 121257. doi.org/10.1016/j.jclepro.2020.121257
- Liu, Y., Zhuge, Y., Chow, C.W.K., Keegan, A., Pham, P.N., Li, D., Qian, G., Wang, L. (2020c) Recycling drinking water treatment sludge into eco-concrete blocks with CO<sub>2</sub> curing: Durability and leachability, *Science of the Total Environment*, 746, 141182. doi.org/10.1016/j.scitotenv.2020.141182
- Liu, Y., Zhuge, Y., Chow, C.W.K., Keegan, A., Li, D., Pham, P.N., Li, D., Oh, J.-A., Siddique, R. (2021a) The potential use of drinking water sludge ash as supplementary cementitious material in the manufacture of concrete blocks. *Resources, Conservation and Recycling*, 168, 105291. doi.org/10.1016/j.resconrec.2020.105291
- Liu, Y., Zhuge, Y., Chow, C.W.K., Keegan, A., Ma, J., Hall, C., Li, D., Pham, P.N., Huang, J., Duan, W., Wang, L. (2021b) Cementitious composites containing alum sludge ash: An investigation of microstructural features by an advanced nanoindentation technology. *Construction and Building Materials*, 299, 124286. doi.org/10.1016/j.conbuildmat.2021.124286
- Liu, Y., Zhuge, Y., Chow, C.W.K., Keegan, A., Li, D., Pham, P.N., Yao, Y., Kitipornchai, S., Siddique, R. (2022a) Effect of alum sludge ash on the high-temperature resistance of mortar. *Resources, Conservation and Recycling*, 176, 105958. doi.org/10.1016/j.resconrec.2021.105958
- Liu, Y., Zhuge, Y., Duan, W., Huang, G., Yao, Y. (2022b) Modification of microstructure and physical properties of cement-based mortar made with limestone and alum sludge. *Journal of Building Engineering*, 58, 105000. doi.org/10.1016/j.jobbe.2022.105000
- Makris, K.C., Sarkar, D., Datta, R. (2006b) Aluminum-based drinking-water treatment residuals: A novel sorbent for perchlorate removal. *Environmental Pollution*, 140, 9-12. doi: 10.1016/j.envpol.2005.08.075
- Makris, K.C., Sarkar, D., Parsons, J.G., Datta, R., Gardea-Torresdey, J.L. (2009) X-ray absorption spectroscopy as a tool investigating arsenic(III) and arsenic(V) sorption by aluminum-based drinking water treatment residual. *Journal of Hazardous Materials*, 171, 980-986. doi: 10.1016/j.jhazmat.2009.06.102
- Malik, D.S., Jain, C.K., Yadav, A.K. (2016) Removal of heavy metals from emerging cellulosic low-cost adsorbents: a review. *Applied Water Science*, 24 pp. doi: 10.1007/s13201-016-0401-8
- Mandal, P., Debbarma, S.R., Saha, A., Ruj, B. (2016) Disposal problem of arsenic sludge generated during arsenic removal from drinking water. *Procedia Environmental Sciences*, 35, 943-949. doi: 10.1016/j.proenv.2016.07.084

- Maqpool, N., Khan, Z., Asghar, A. (2015) Reuse of alum sludge for phosphorus removal from municipal wastewater. *Desalination and Water Treatment*, 57, 13246-13254. doi: 10.1080/19443994.2015.1055806
- Maraschin, M., Ferrari, K.F.H., Carissimi, E. (2020) Acidification and flocculation of sludge from a water treatment plant: New action mechanisms. *Separation and Purification Technology*, 252, 117417. doi.org/10.1016/j.seppur.2020.117417
- Marguti, A.L., Filho, S.S.F., Piveli, R.P. (2018) Full-scale effects of addition of sludge from water treatment stations into processes of sewage treatment by conventional activated sludge. *Journal of Environmental Management*, 215, 283-293. doi.org/10.1016/j.jenvman.2018.03.072
- Mohammed, A., Al-Tahmazi, T., Babatunde, A.O. (2016) Attenuation of metal contamination in landfill leachate by dewatered waterworks sludges. *Ecological Engineering*, 94, 656-667. dx.doi.org/10.1016/j.ecoleng.2016.06.123
- Monteiro, S.N., Alexandre, J., Margem, J.I., Sánchez, R., Vieira, C.M.F. (2008) Incorporation of sludge waste from water treatment plant into red ceramic. *Construction and Building Materials*, 22, 1281-1287. doi: 10.1016/j.conbuildmat.2007.01.013
- Mortula, M.M., Gagnon, G.A. (2007a) Alum residuals as a low technology for phosphorus removal from aquaculture processing water. *Aquacultural Engineering*, 36, 233-238. doi: 10.1016/j.aquaeng.2006.12.003
- Mortula, M.M., Gagnon, G.A. (2007b) Phosphorus treatment of secondary municipal effluent using oven-dried alum residual. *Journal of Environmental Science and Health Part A*, 42, 1685-1691. doi: 10.1080/10934520701518265
- Mushtaq, F., Zahid, M., Bhatti, I.A., Nasir, S., Hussain, T. (2019) Possible applications of coal fly ash in wastewater treatment. *Journal of Environmental Management*, 240, 27-46 doi.org/10.1016/j.jenvman.2019.03.054
- Nagar, R., Sarkar, D., Makris, K.C., Datta, R. (2010) Effect of solution chemistry on arsenic adsorption by Fe- and Al-based drinking water treatment residuals. *Chemosphere*, 78, 1028-1035. doi: 10.1016/j.chemosphere.2009.11.034
- Nair, A.T., Ahammed, M.M. (2015) The reuse of water treatment sludge as a coagulant for post-treatment of UASB reactor treating urban wastewater. *Journal of Cleaner Production*, 96, 272-281. dx.doi.org/10.1016/j.jclepro.2013.12.037
- Na Nagara, V., Sarkar, D., Barrett, K., Datta, R. (2021) Greening the gray infrastructure: Green adsorbent media for catch basin inserts to remove stormwater pollutants. *Environmental Technology and Innovation*, 21, 101334. doi.org/10.1016/j.eti.2020.101334
- Nawar, N., Ahmad, M.E., El Said, W.M., Moalla, S.M.N. (2015) Adsorptive removal of phosphorus from wastewater using drinking water treatment-alum sludge (DWT-AS) as low cost adsorbent. *American Journal of Chemistry and Application*, 2, 79-85. www.aascit.org/journal/ajca
- Ng, Y.L., Aldahdooh, M.A.A., Alazaiza, M.Y.D., Bashir, M.J.K., Chok, V.S., Ng, C.A. (2022) Influence of alum sludge and ground blast furnace slag on properties of cement mortar. *Cleaner Engineering and Technology*, 6, 100376. doi.org/10.1016/j.clet.2021.100376
- Ngatenah, S.N.I., Kutty, S.R.M., Isa, M.H. (2010) Optimization of heavy metal removal from aqueous solution using groundwater treatment plant sludge (GWTPS). *International Conference on Environment*, 9 pp. (ICENV2010)
- Nguyen, M.D., Baghbani, A., Alnedawi, A., Ullah, S., Kafle, B., Thomas, M., Moon, E.M., Milne, N.A. (2023) Investigation on the suitability of aluminium-based water treatment sludge as a sustainable soil replacement for road construction. *Transportation Engineering*, 12, 100175. doi.org/10.1016/j.treng.2023.100175
- Nimwinya, E., Arjhar, W., Horpibulsuk, S., Phoo-ngernkham, T., Poowancun, A. (2016) A sustainable calcined water treatment sludge and rice husk ash geopolymer. *Journal of Cleaner Production*, 119, 128-134. dx.doi.org/10.1016/j.jclepro.2016.01.060
- Oh, T.-K., Chiruski, J. (2010) Fluoride adsorption on water treatment sludge processed by polyaluminium chloride. *Journal of Food, Agriculture and Environment*, 8, 358-362. [www.world-food.net](http://www.world-food.net)

Oliver, I.W., Grant, C.D., Murray, R.S. (2011) Assessing effects of aerobic and anaerobic conditions on phosphorus sorption and retention capacity of water treatment residuals. *Journal of Environmental Management*, 92, 960-966. doi: 10.1016/j.envman.2010.11.016

Ong, D.C., Kan, C.-C., Pingul-Ong, S.M.B., de Luna, M.D.G. (2017) Utilization of groundwater treatment plant (GWTP) sludge for nickel removal from aqueous solutions: Isotherm and kinetic studies. *Journal of Environmental Chemical Engineering*, 5, 5746-5753. dx.doi.org/10.1016/j.jece.2017.10.046

Owaid, H.M., Hamid, R., Taha, M.R. (2014) Influence of thermally activated alum sludge ash on the engineering properties of multiple-blended binder's concretes. *Construction and Building Materials*, 61, 216-229. dx.doi.org/10.1016/j.conbuildmat.2014.03.014

Owaid, H.M., Hamid, R., Taha, M.R. (2019) Durability properties of multiple-blended binder concretes incorporating thermally activated alum sludge ash. *Construction and Building Materials*, 200, 591-603. doi.org/10.1016/j.conbuildmat.2018.12.149

Park, W.H., Polprasert, C. (2008) Phosphorus adsorption characteristics of oyster shell and alum sludge and their application for nutrient control in constructed wetland. *Journal of Environmental Science and Health Part A*, 43, 511-517. doi: 10.1080/10934520701796440

Park, W.H. (2009) Integrated constructed wetland systems employing alum sludge and oyster shells as filter media for P removal. *Ecological Engineering*, 35, 1275-1282. doi: 10.1016/j.ecoleng.2009.05.015

Pham, P.N., Duan, W., Zhuge, Y., Liu, Y., Tormo, I.E.S. (2021) Properties of mortar incorporating untreated and treated drinking water treatment sludge. *Construction and Building Materials*, 280, 122558. doi.org/10.1016/j.conbuildmat.2021.122558

Prakash, P., Sengupta, A.K. (2003) Selective coagulant recovery from water treatment plant residuals using Donnan membrane process. *Environmental Science and Technology*, 37, 4468-4474. doi: 10.1021/es030371q

Qin, H., Hu, T., Zhai, Y., Lu, N., Aliyeva, J. (2020) The improved method of heavy metals removal by biosorbents: A review. *Environmental Pollution*, 258, 113777. doi.org/10.1016/j.envpol.113777

Rahman, Z.A., Saleh, N.M.M., Idris, W.M.R., Lihan, T. (2019) Thermal effect on mechanical characteristics of drinking water sludge brick incorporated with rich husk ash. *Sains Malaysiana*, 48, 2541-2549. dx.doi.org/10.17576/jsm-2019-44811-24

Ramadan, M.O., Fouad, H.A., Hassanain, A.M. (2008) Reuse of water treatment plant sludge in brick manufacturing. *Journal of Applied Science Research*, 4, 1223-1229.

Rashed, M.N., El Taher, M.A.E-A., Fadlalla, M.M. (2016) Adsorption of methylene blue using modified adsorbents from drinking water treatment sludge. *Water Science and Technology*, 74, 1885-1897. doi.org/10.2166/wst.2016.377

Razali, M., Zhao, Y.Q., Bruen, M. (2007) Effectiveness of a drinking-water treatment sludge in removing different phosphorus species from aqueous solutions. *Separation and Purification Technology*, 55, 300-306. doi: 10.1016/j.seppur.2006.12.004

Rebosura, M. Jr., Salehin, S., Pikaar, I., Kulandaivelu, J., Jiang, G., Keller, J., Sharma, K., Yuan, Z. (2020) Effects of in-sewer dosing of iron-rich drinking water sludge on wastewater collection and treatment systems. *Water Research*, 171, 115396. doi.org/10.1016/j.watres.2019.115396

Rebosura, M. Jr., Salehin, S., Pikaar, I., Keller, J., Sharma, K., Yuan, Z. (2021) The impact of primary sedimentation on the use of iron-rich drinking water sludge on the urban wastewater system. *Journal of Hazardous Materials*, 402, 124051. doi.org/10.1016/j.jhazmat.2020.124051

Ren, B., Lyczko, N., Zhao, Y., Nzihou, A. (2020) Alum sludge as an efficient sorbent for hydrogen sulfide removal: Experimental mechanisms and modeling studies. *Chemosphere*, 248, 126010. doi.org/10.1016/j.chemosphere.2020.126010

Rodríguez, N.H., Ramírez, S.M., Varela, M.T.B., Guillem, M., Puig, J., Larrotcha, E., Flores, J. (2010) Re-use of drinking water treatment (DWTP) sludge: Characterization and technological behaviour of cement mortars with

- atomized sludge additions. *Cement and Concrete Research*, 40, 778-786.  
doi: 10.1016/j.cemconres.2009.11.012
- Rodríguez, N.H., Ramírez, S.M., Varela, M.T.B., Guillem, M., Puig, J., Larrotcha, E., Flores, J. (2011) Evaluation of spray-dried sludge from drinking water treatment plants as a prime material for clinker manufacture. *Cement and Concrete Composites*, 33, 267-275. doi: 10.1016/j.cemconcomp.2010.10.020
- Ruviaro, A.S., Silvestro, L., Scolaro, T.P., de Matos, P.R., Pelisser, F. (2021) Use of calcined water treatment plant sludge for sustainable cementitious composites production. *Journal of Cleaner Production*, 327, 129384.  
doi.org/10.1016/j.jclepro.2021.129384
- Sajath, S.H.M., Nihmiya, A.R., Arachchige, U.S.P.R. (2022) Handling the sludge when using polyaluminum chloride as a coagulant in the potable water treatment process. *Nature Environment and Pollution Technology*, 21, 617-624.  
doi.org/10.46488/NEPT.2022.v21i02.020
- Sales, A., de Souza, F.R., Almeida, F.D.C.R. (2011) Mechanical properties of concrete produced with a composite of water treatment sludge and sawdust. *Construction and Building Materials*, 25, 2793-2798.  
doi: 10.1016/j.conbuildmat.2010.12.057
- Sarkar, D., Makris, K.C., Vandanapu, V., Datta, R. (2007) Arsenic immobilization in soils amended with drinking water treatment residuals. *Environmental Pollution*, 146, 414-419.  
doi: 10.1016/j.envpol.2006.06.035
- Shakya, A.K., Bhande, R., Ghosh, P.K. (2019) A practical approach on reuse of drinking water treatment plant residuals for fluoride removal. *Environmental Technology*, 13 pp. doi.org/10.1080/09593330.2019.1588383
- Shamaki, M., Adu-Amankwah, S., Black, L. (2021) Reuse of UK alum water treatment sludge in cement-based materials. *Construction and Building Materials*, 275, 122047. doi.org/10.1016/j.conbuildmat.2020.122047
- Shen, C., Zhao, Y.Q., Liu, R.B., Mao, Y., Morgan, D. (2018) Adsorption of phosphorus with calcium alginate beads containing drinking water treatment residual. *Water and Science Technology*, 78, 1980-1989.  
doi: 10.2166/wst.2018.473
- Shen, C., Zhao, Y.Q., Liu, R.B., Morgan, D., Wei, T. (2019b) Enhancing wastewater remediation by drinking water treatment residual-augmented floating treatment wetlands. *Science of the Total Environment*, 673, 230-236.  
doi.org/10.1016/j.scitotenv.2019.04.035
- Silvetti, M., Castaldi, P., Garau, G., Demurtas, D., Deiana, S. (2015) Sorption of cadmium(II) and Zinc(II) from aqueous solutions by water treatment residuals at different pH values. *Water, Air and Soil Pollution*, 226, 313, 13 pp. doi: 10.1007/s11270-015-2578-0
- Sirisha, D., Mukkanti, K., Gandhi, N. (2012) Adsorption studies on alum sludge. *Advances in Applied Science Research*, 3, 3362-3366.
- Siswoyo, E., Mihara, Y., Tanaka, S. (2014) Determination of key components and adsorption capacity of low cost adsorbent based on sludge of drinking water treatment plants to adsorb cadmium ion in water. *Applied Clay Science*, 97-98, 146-152. dx.doi.org/10.1016/j.clay.2014.05.024
- Siswoyo, E., Qoniah, I., Lestari, P., Fajri, J.A., Sani, R.A., Sari, D.G., Boving, T. (2019) Development of floating adsorbent for cadmium derived from modified drinking water treatment plant sludge. *Environmental Technology and Innovation*, 14, 10312. doi.org/10.1016/j.eti.2019.01.006
- Souza, L.R.R., Nakadi, F.V., Zanatta, M.B.T., da Veiga, M.A.M.S. (2019) Reduction of bioaccessibility and leachability of Pb and Cd in soils using sludge from water treatment plant. *International Journal of Environmental Science and Technology*, 16, 5397-5408. doi.org/10.1007/s13762-018-2042-y
- Świdarska-Dąbrowska, R., Piaskowski, K., Zarzycki, P.K. (2018) Preliminary studies of synthetic dye adsorption on iron sludge and activated carbons. *Journal of AOAC International*, 101, 1429-146. doi.org/10.5740/jaoacint.18-0060

- Tantawy, M.A. (2015) Characterization and pozzolanic properties of calcined alum sludge. *Materials Research Bulletin*, 61, 415-421. dx.doi.org/10.1016/j.materresbull.2014.10.042
- Tantawy, M.A., Mohamed, R.S.A. (2017) Middle Eocene clay from Goset Abu Khashier: Geological assessment and utilization with drinking water treatment sludge in brick manufacturing. *Applied Clay Science*, 138, 114-124. dx.doi.org/10.1016/j.clay.2017.01.005
- Teixera, S.R., Santos, G.T.A., Souza, A.E., Alessio, P., Souza, S.A., Souza, N.R. (2011) The effect of incorporation of a Brazilian water treatment plant sludge on the properties of ceramic materials. *Applied Clay Science*, 53, 561-565. doi: 10.1016/j.clay.2011.04.004
- Teoh, W.P., Chee, S.Y., Habib, N.Z., Chok, V.S., Lem, K.H., Looi, S.Y., Ng, C.A. (2022) Recycling of treated alum sludge and glycerine pitch in the production of eco-friendly roofing tiles: Physical properties, durability, and leachability. *Journal of Building Engineering*, 52, 104387. doi.org/10.1016/j.jobee.2022.104387
- Titshall, L.W., Hughes, J.C. (2005) Characterization of some South African water treatment residues and implications for land application. *Water SA*, 31-299-307. www.wrc.org.za
- Ungureanu, G., Santos, S., Boaventura, R., Botelho, C. (2015) Arsenic and antimony in water and wastewater: Overview of removal techniques with special to latest advances in adsorption. *Journal of Environmental Management*, 151, 326-342. dx.doi.org/10.1016/j.envman.2014.12.051
- Van Truong, T., Kim, D.-J. (2021) Phosphate removal using thermally regenerated Al adsorbent from drinking water treatment sludge. *Environmental Research*, 196, 110877. doi.org/10.1016/j.envres.2021.110877
- Wagner, D.J., Elliott, H.A., Brandt, R.C., Jaiswal, D. (2008) Managing biosolids runoff phosphorus using buffer strips enhanced with drinking water treatment residuals. *Journal of Environmental Quality*, 37, 1567-1574. doi: 10.2134/jeq2007.0338
- Wairajejan, N., Asavapisit, S., Sombatsompot, K. (2014) Strength and microstructure of water treatment residue-based geopolymers containing heavy metals. *Construction and Building Materials*, 50, 486-491. dx.doi.org/10.1016/j.conbuildmat.2013.08.047
- Wang, C.-H., Gao, S.-J., Wang, T.-X., Tian, B.-H., Pei, Y.-S. (2011) Effectiveness of sequential thermal and acid activation on phosphorus removal by ferric and alum water treatment residuals. *Chemical Engineering Journal*, 172, 885-891. doi: 10.1016/j.cej.2011.06.078
- Wang, C., Jiang, H.-L., Yuan, N., Pei, Y., Yan, Z. (2016) Tuning the adsorptive properties of drinking water treatment residue via oxygen-limited heat treatment for environmental cycle. *Chemical Engineering Journal*, 284, 571-581. dx.doi.org/10.1016/j.cej.2015.09.011
- Wang, C., Wang, Z., Lin, L., Tian, B., Pei, Y. (2012a) Effect of low molecular weight organic acids on phosphorus adsorption by ferric-alum water treatment residuals. *Journal of Hazardous Materials*, 203-204, 145-150. doi: 10.1016/j.jhazmat.2011.11.084
- Wang, C., Wu, Y., Wang, Y., Bai, L., Jiang, H., Yu, J. (2018) Lanthanum-modified drinking water treatment residue for initial rapid and long-term equilibrium phosphorus immobilization to control eutrophication. *Water Research*, 137, 173-183. doi.org/10.1016/j.watres.2018.03.018
- Wang, L., Zou, F., Fang, X., Tsang, D.C.W., Poon, C.S., Leng, Z., Baek, K. (2018d) A novel type of controlled low strength material derived from alum sludge and green materials. *Construction and Building Materials*, 165, 792-800. doi.org/10.1016/j.conbuildmat.2018.01.078
- Wolff, E., Schwabe, W.K., Conceição, S.V. (2015) Utilization of water treatment plant sludge in structural ceramics. *Journal of Cleaner Production*, 96, 282-289. dx.doi.org/10.1016/j.jclepro.2014.06.018
- Xu, G.R., Yan, Z.C., Wang, Y.C., Wang, N. (2009) Recycle of alum recovered from water treatment sludge in chemically enhanced primary treatment. *Journal of Hazardous Materials*, 161, 663-669. doi: 10.1016/j.jhazmat.2008.04.008
- Xu, W., Xu, J., Liu, J., Li, H., Cao, B., Huang, X., Li, G. (2014) The utilization of lime-dried sludge as resource for producing cement. *Journal of Cleaner Production*, 83, 286-293. dx.doi.org/10.1016/j.jclepro.2014.07.070

- Yang, J., Ren, Y., Chen, S., Zhang, Z., Pang, H., Wang, X., Lu, J. (2023) Thermally activated drinking water treatment sludge as a supplementary cementitious material: Properties, pozzolanic activity and hydration characteristics. *Construction and Building Materials*, 365, 130027. doi.org/10.1016/j.conbuildmat.2022.130027
- Yang, L., Wei, J., Zhang, Y., Wang, J., Wang, D. (2014) Reuse of acid coagulant-recovered drinking waterworks sludge residual to remove phosphorus from wastewater. *Applied Surface Science*, 305, 337-346. dx.doi.org/10.1016/j.apsusc.2014.03.081
- Yang, Y., Tomlinson, D., Kennedy, S., Zhao, Y.Q. (2006a) Dewatered alum sludge: a potential adsorbent for phosphorus removal. *Water Science and Technology*, 54, 207-213. doi.org/10.2166/wst.2006.564
- Yang, Y., Zhao, Y.Q., Babatunde, A.O., Wang, L., Ren, Y.X., Han, Y. (2006b) Characteristics and mechanisms of phosphate adsorption on dewatered alum sludge. *Separation and Purification Technology*, 51, 193-200. doi: 10.1016/j.seppur.2006.01.013
- Yang, Y., Zhao, Y.Q., Kearney, P. (2008) Influence of ageing on the structure and phosphate adsorption capacity of dewatered alum sludge. *Chemical Engineering Journal*, 145, 276-284. doi: 10.1016/j.cej.2008.04.026
- Yang, L., Wei, J., Liu, Z., Wang, J., Wang, D. (2015) Material prepared from drinking waterworks sludge as adsorbent for ammonium removal wastewater. *Applied Surface Science*, 330, 228-236. dx.doi.org/10.1016/j.apsusc.2015.01.017
- Yen, C.-L., Tseng, D.-H., Lin, T.-T. (2011) Characterization of eco-cement paste produced from waste sludges. *Chemosphere*, 84, 220-226. doi: 10.1016/j.chemosphere.2011.04.050
- Yildiz, S., Sevinç, S. (2018) Heavy metal adsorption by dewatered iron-containing waste sludge. *Ecological Chemistry and Engineering S*, 25, 431-456. doi: 10.1515/eces-2018-0030
- Yuan, N., Wang, C., Pei, Y. (2016) Investigation on the eco-toxicity of lake sediments with the addition of drinking water treatment residuals. *Journal of Environmental Sciences*, 46, 5-15. dx.doi.org/10.1016/j.jes.2015.12.022
- Yusuff, S.M., Ong, K.K., Wan Yunus, W.M.Z., Fitrianto, A., Ahmad, M., Ibrahim, N.A., Ros, F.C., Teoh, C.C., Tawil, S.N.M. (2017) Adsorption of carbon dioxide by reusing drinking water treatment plant sludge. *Asian Journal of Chemistry*, 29, 2665-2670. doi.org/10.14233/ajchem.2017.20769
- Yusuff, S.M., Ong, K.K., Wan Yunus, W.M.Z., Fitrianto, A., Ahmad, M., Ibrahim, N.A., Ros, F.C., Teoh, C.C., (2018) Carbon dioxide sorption isotherm and kinetics by alum sludge. *Materials Today; Proceedings*, 5, 21948-21955. www.materialstoday.com/proceedings
- Zamora, R.M.R., Espesal Ayala, F., Garcia, L.C., Moreno, A.D., Schouwenaars, R. (2008) Optimization of the preparation conditions of ceramic products using drinking water treatment sludges. *Journal of Environmental Science and Health Part A*, 43, 1562-1568. doi: 10.1080/10934520802293750
- Zhao, Y., Ren, B., O'Brien, A., O'Toole, S. (2016) Using alum sludge for clay brick: An Irish investigation. *International Journal of Environmental Studies*, 73, 719-730. dx.doi.org/10.1080/00207233.2016.1160651
- Zhang, H., Liu, X., Ma, J., Lin, C., Qi, C., Li, X., Zhou, Z., Fan, G. (2018) Activation of peroxymonosulfate using drinking water treatment residuals for the degradation of atrazine. *Journal of Hazardous Materials*, 344, 1220-1228. doi.org/10.1016/j.jhazmat.2017.11.038
- Zhao, Y.Q., Razali, M., Babatunde, A.O., Yang, Y., Bruen, M. (2007) Reuse of aluminum-based water treatment sludge to immobilize a wide range of phosphorus contamination: Equilibrium study with different isotherm models. *Separation Science and Technology*, 42, 2705-2721. doi: 10.1080/01496390701511531
- Zhao, Y.Q., Babatunde, A.O., Razali, M., Harty, F. (2008) Use of dewatered alum sludge as a substrate in reed bed treatment systems for wastewater treatment. *Journal of Environmental Science and Health A*, 43, 105-110. doi: 10.1080/10934520701750264
- Zhao, Y.Q., Babatunde, A.O., Zhao, X.H., Li, W.C. (2009) Development of alum-based constructed wetland: An innovative and cost effective system for wastewater treatment. *Journal of Environmental Science and Health A*, 44, 827-832. doi: 10.1080/10934520902928685



Zhao, Y.Q., Babatunde, A.O., Hu, Y.S., Kumar, J.L.G., Zhao, X.H. (2010b) A two-prong approach of beneficial reuse of alum sludge in engineered wetland: First experience from Ireland. *Waste Biomass Valorization*, 1, 227-234. doi: 10.1007/s12649-010-9020-z

Zhao, Y.Q., Babatunde, A.O., Hu, Y.S., Kumar, J.L.G., Zhao, X.H. (2011) Pilot field-scale demonstration of a novel alum-sludge-based constructed wetland system for enhanced wastewater treatment. *Process Biochemistry*, 46, 278-283. doi: 10.1016/j.procbio.2010.08.023

Zhao, Y., Wang, C., Wendling, L.A., Pei, Y. (2013) Feasibility of using drinking water treatment residuals as a novel chlorpyrifos adsorbent. *Journal of Agricultural and Food Chemistry*, 61, 7446-7452. dx.doi.org/10.1021/jf401763f

Zhao, Y., Welding, L.A., Wang, C., Pei, Y. (2015) Use of Fe/Al drinking water treatment residuals as amendments for enhancing the retention capacity of glyphosate in agricultural soils. *Journal of Environmental Sciences*, 34, 133-142. dx.doi.org/10.1016/j.jes.2015.01.030

Zhao, Y.Q., Yang, Y. (2010a) Extending the use of dewatered alum sludge as a P-trapping material in effluent purification: Study on two separate water treatment sludges. *Journal of Environmental Science and Health A*, 44, 1234-1239. doi: 10.1080/10934529.2010.493794

Zou, J.L., Xu, G.R., Li, G.B. (2009) Ceramsite obtained from water and wastewater sludge and its characteristics affected by Fe<sub>2</sub>O<sub>3</sub>, CaO, and MgO. *Journal of Hazardous Materials*, 165, 995-1001. doi: 10.1016/j.jhazmat.2008.10.113

Zhou, Y.-F., Haynes, R.J. (2010b) Water treatment sludge can be used as an adsorbent for heavy metals in wastewater stream. Conference on Waste Management and the Environment V, In: *WIT Transactions on Ecology and the Environment*, 140, 379-389. doi: 10.2495/WM100341

Zhou, Y.-F., Haynes, R.J. (2011a) Removal of Pb(II), Cr(III) and Cr(VI) from aqueous solutions using alum-derived water treatment sludge. *Water, Air and Soil Pollution*, 215, 631-643. doi: 10.1007/s11270-010-0505-y

Zhou, Y.-F., Haynes, R.J. (2011b) A comparison of inorganic solid wastes as adsorbents of heavy metal cations in aqueous solutions and their capacity for desorption and regeneration. *Water, Air and Soil Pollution*, 218, 457-470. doi: 10.1007/s11270-010-0659-7

Zhuge, Y., Liu, Y., Pham, P.N. (2022) Sustainable utilization of drinking water sludge. In: *Low Carbon Stabilization and Solidification of Hazardous Wastes*, Chap. 19, 303-319. doi.org/10.1016/B978-0-12-824004-5.00001-3

Zou, J.L., Xu, G.R., Li, G.B. (2009) Ceramsite obtained from water and wastewater sludge and its characteristics affected by Fe<sub>2</sub>O<sub>3</sub>, CaO, and MgO. *Journal of Hazardous Materials*, 165, 995-1001. doi: 10.1016/j.jhazmat.2008.10.113
